# Supplementary material for: PPI-hotspotID for detecting protein–protein interaction hot spots from the free protein structure
Source: eLife. 2024 Sep 16;13:RP96643. doi: 10.7554/eLife.96643 (PMC11405013; doi:10.7554/eLife.96643)
Supplement: Source data 1. [file elife-96643-data1.xlsx]

## Sheet: Sheet1
Uniprot code	Uniprot code of the binding partner	PDB ID	Uniprot # of PPI-hot spots	PDB # of PPI-hot spots	wild->mutant	Binding free energy change (kcal/mol)	Pubmed #	PPI-hot spots assignment
P21836	P0C1Z0	1c2b-A	328	297	F->I	1.98	8157652	P
P21836	P0C1Z0	1c2b-A	155	124	Y->Q	2.88	8157652	P
P21836	P0C1Z0	1c2b-A	103	72	Y->N	5.01	8157652	P
P21836	P0C1Z0	1c2b-A	317	286	W->R	8.45	8157652	P
P21836	P0C1Z0	1c2b-A	368	337	Y->A	0.37	8157652	N
Q62768	n/a	4y21-A	1364	432	I->F	n/a	16271475	P
P54725	P12520	1oqy-A	333	333	P->E	n/a	11087358	P
O75530	P62805	3jzn-A	97	97	F->A	n/a	20974918	P
O75530	P62805	3jzn-A	148	148	Y->A	n/a	20974918	P
O75530	P62805	3jzn-A	364	364	W->A	n/a	20974918	P
O75530	P62805	3jzn-A	364	364	W->L	n/a	20974918	P
O75530	P62805	3jzn-A	365	365	Y->A	n/a	20974918	P
Q15750	P98170	2j4o-A	213	213	D->A	n/a	17560374	P
Q15750	P98170	2j4o-A	216	216	F->A	n/a	17560374	P
P63096	O14924	5js7-A	42	42	G->R	n/a	22383884	P
P46108	Q14185	2eyz-A	150	150	D->K	n/a	8662907	P
P46108	Q6ZS72	2eyz-A	169	169	W->K	n/a	31311869	P
P46108	Q9H7D0	2eyz-A	169	169	W->L	n/a	12432078	P
P46108	Q6ZS72	2eyz-A	275	275	W->K	n/a	31311869	N
P61964	n/a	2h14-A	47	47	A->E	n/a	16600877	P
P61964	n/a	2h14-A	91	91	S->F	n/a	16600877	P
P61964	n/a	2h14-A	107	107	D->A	n/a	16600877	P
P61964	n/a	2h14-A	133	133	F->D	n/a	16600877	P
P61964	n/a	2h14-A	322	322	E->A	n/a	16600877	P
P61964	n/a	2h14-A	107	107	D->N	2.22	16829960	P
P61964	n/a	2h14-A	133	133	F->A	2.22	16829960	P
P61964	n/a	2h14-A	133	133	F->L	2.22	16829960	P
P61964	n/a	2h14-A	263	263	F->A	2.22	16829960	P
P61964	n/a	2h14-A	263	263	F->W	2.22	16829960	P
P61964	n/a	2h14-A	321	321	L->A	nb	16829960	P
P61964	Q15291	2h14-A	225	225	N->A	nb	21220120	P
P61964	Q15291	2h14-A	240	240	L->K	nb	21220120	P
P61964	n/a	2h14-A	260	260	Y->F	-0.57	16829960	N
Q15257	P67775	2ixm-A	305	270	E->A	n/a	16916641	P
Q15257	P67775	2ixm-A	325	290	G->D	n/a	16916641	P
Q15257	P67775	2ixm-A	329	294	M->D	n/a	16916641	P
Q15257	P67775	2ixm-A	185	150	D->A	n/a	16916641	N
Q15257	P67775	2ixm-A	190	155	H->A	n/a	16916641	N
Q15257	P67775	2ixm-A	228	193	R->A	n/a	16916641	N
Q15257	P67775	2ixm-A	239	204	A->D	n/a	16916641	N
Q15257	P67775	2ixm-A	240	205	G->D	n/a	16916641	N
Q15257	P67775	2ixm-A	243	208	G->D	n/a	16916641	N
Q15257	P67775	2ixm-A	244	209	V->D	n/a	16916641	N
Q15257	P67775	2ixm-A	249	214	D->A	n/a	16916641	N
Q15257	P67775	2ixm-A	316	281	V->D	n/a	16916641	N
Q15257	P67775	2ixm-A	337	302	K->G	n/a	16916641	N
Q15257	P67775	2ixm-A	183	148	R->L	n/a	16916641	N
Q15257	P67775	2ixm-A	221	186	N->A	n/a	16916641	N
Q15257	P67775	2ixm-A	343	308	H->A	n/a	16916641	N
Q15257	n/a	2ixm-A	160	125	P->A	n/a	16916641	N
Q15257	n/a	2ixm-A	339	304	P->G	n/a	16916641	N
Q14145	Q16236	4ifj-A	334	334	Y->A	n/a	16888629	P
Q14145	Q16236	4ifj-A	382	382	N->A	n/a	16888629	P
Q14145	Q16236	4ifj-A	436	436	H->A	n/a	16888629	P
Q14145	Q16236	4ifj-A	525	525	Y->A	n/a	16888629	P
Q14145	Q16236	4ifj-A	572	572	Y->A	n/a	16888629	P
Q14145	Q16236	4ifj-A	380	380	R->A	n/a	16888629	P
Q14145	Q16236	4ifj-A	415	415	R->A	n/a	16888629	P
Q14145	Q16236	4ifj-A	483	483	R->A	n/a	16888629	P
Q14145	Q16236	4ifj-A	335	335	F->A	n/a	16888629	N
Q14145	Q16236	4ifj-A	337	337	Q->A	n/a	16888629	N
Q14145	Q16236	4ifj-A	387	387	N->A	n/a	16888629	N
Q14145	Q16236	4ifj-A	434	434	C->A	n/a	16888629	N
Q14145	Q16236	4ifj-A	478	478	F->A	n/a	16888629	N
Q14145	Q16236	4ifj-A	530	530	Q->A	n/a	16888629	N
Q14145	Q16236	4ifj-A	577	577	F->A	n/a	16888629	N
Q14145	Q16236	4ifj-A	336	336	R->A	n/a	16888629	N
Q14145	Q16236	4ifj-A	459	459	R->A	n/a	16888629	N
Q14145	Q16236	4ifj-A	551	551	K->A	n/a	16888629	N
Q14145	Q16236	4ifj-A	553	553	R->A	n/a	16888629	N
Q14145	n/a	4ifj-A	384	384	P->A	n/a	16888629	N
P62593	P35804	1zg4-A	102	104	E->A	2.83	24947275	P
P62593	O87916	1zg4-A	103	105	Y->A	2.29	24947275	P
P62593	O87916	1zg4-A	109	111	K->A	2.18	24947275	P
P62593	O87916	1zg4-A	127	129	M->A	2.56	24947275	P
P62593	P35804	1zg4-A	102	104	E->A	2.34	17070843	P
P62593	P35804	1zg4-A	102	104	E->K	4.23	9891008	P
P62593	P35804	1zg4-A	102	104	E->D	3.6	21294157	P
P62593	P35804	1zg4-A	102	104	E->K	2.2	21294157	P
P62593	P35804	1zg4-A	214	216	V->A	-0.59	24947275	N
P62593	O87916	1zg4-A	214	216	V->A	0.04	24947275	N
P62593	P35804	1zg4-A	166	168	E->A	-0.02	17070843	N
P62593	P35804	1zg4-A	214	216	V->A	-0.93	17070843	N
P62593	P35804	1zg4-A	236	238	G->S	-0.27	9891008	N
P62593	n/a	1zg4-A	98	100	N->A	-1.5	24947275	N
P62593	n/a	1zg4-A	105	107	P->A	0.24	24947275	N
P62593	n/a	1zg4-A	97	99	Q->A	0.43	17070843	N
P62593	n/a	1zg4-A	98	100	N->A	-0.14	17070843	N
P62593	n/a	1zg4-A	105	107	P->A	0.17	17070843	N
P62593	n/a	1zg4-A	128	130	S->A	0.33	15618400	N
P62593	n/a	1zg4-A	238	241	R->Y	-0.14	27956635	N
P62593	n/a	1zg4-A	169	171	E->K	-0.6	27956635	N
P62593	n/a	1zg4-A	237	240	E->K	-0.41	27956635	N
P62593	n/a	1zg4-A	268	272	M->A	-0.05	24947275	N
P62593	P35804	1zg4-A	268	272	M->A	-0.05	24947275	N
P62593	O87916	1zg4-A	268	272	M->A	0.28	24947275	N
P17844	Q13547	4a4d-A	53	53	K->R	n/a	17369852	P
P17427	Q7TQF7	1qts-A	840	840	W->A	n/a	10380931	P
P17427	Q7TQF7	1qts-A	907	907	E->A	n/a	10380931	P
P17427	Q7TQF7	1qts-A	920	920	R->A	n/a	10380931	P
P17427	P42567	1qts-A	840	840	W->A	n/a	10380931	P
P17427	n/a	1qts-A	840	840	W->A	n/a	10380931	P
P17427	n/a	1qts-A	840	840	W->A	n/a	10380931	P
P17427	Q61548	1qts-A	837	837	F->A	n/a	10380931	P
P17427	Q61548	1qts-A	840	840	W->A	n/a	10380931	P
P17427	Q61548	1qts-A	907	907	E->A	n/a	10380931	P
P17427	Q61548	1qts-A	920	920	R->A	n/a	10380931	P
P17427	Q7TQF7	1qts-A	707	707	R->S	n/a	10380931	N
P17427	Q7TQF7	1qts-A	849	849	E->A	n/a	10380931	N
P17427	P42567	1qts-A	707	707	R->S	n/a	10380931	N
P17427	P42567	1qts-A	849	849	E->A	n/a	10380931	N
P17427	n/a	1qts-A	707	707	R->S	n/a	10380931	N
P17427	n/a	1qts-A	849	849	E->A	n/a	10380931	N
P17427	n/a	1qts-A	707	707	R->S	n/a	10380931	N
P17427	n/a	1qts-A	849	849	E->A	n/a	10380931	N
P17427	Q61548	1qts-A	707	707	R->S	n/a	10380931	N
P17427	Q61548	1qts-A	849	849	E->A	n/a	10380931	N
P12493	P49790	6wap-A	189	57	N->S	n/a	29997211	P
P12493	P49790	6wap-A	305	173	R->A	n/a	29997211	P
P12493	P49790	6wap-A	189	57	N->A	n/a	24130490	P
P12493	P49790	6wap-A	189	57	N->D	n/a	24130490	P
P12493	P49790	6wap-A	177	45	E->A	n/a	24130490	N
P12493	P49790	6wap-A	186	54	T->A	n/a	24130490	N
P12493	P49790	6wap-A	202	70	K->A	n/a	24130490	N
P12493	P49790	6wap-A	202	70	K->R	n/a	24130490	N
P12493	P49790	6wap-A	206	74	N->A	n/a	24130490	N
P12493	P49790	6wap-A	206	74	N->D	n/a	24130490	N
P12493	P49790	6wap-A	221	89	G->V	n/a	24130490	N
P12493	n/a	6wap-A	170	38	P->A	n/a	24130490	N
O75832	P06400	1tr4-A	182	182	E->A	n/a	10613832	P
O75832	P06400	1tr4-A	178	178	L->A	n/a	10613832	N
O88838	Q925B0	2afj-A	120	120	Y->A	n/a	16369487	P
O88838	Q925B0	2afj-A	206	206	V->A	n/a	16369487	P
O88838	P29477	2afj-A	120	120	Y->A	n/a	20603330	P
O88838	P29477	2afj-A	120	120	Y->F	n/a	20603330	P
O88838	P29477	2afj-A	206	206	V->A	n/a	20603330	P
O88838	P29477	2afj-A	207	207	W->A	n/a	20603330	P
O88838	Q925B0	2afj-A	210	210	C->A	n/a	16369487	N
O15118	P87666	5f18-A	503	131	F->G	nb	26771495	P
O15118	P87666	5f18-A	503	131	F->A	nb	26771495	P
O15118	P87666	5f18-A	504	132	F->G	nb	26771495	P
O15118	P87666	5f18-A	504	132	F->A	nb	26771495	P
O15118	P87666	5f18-A	506	134	Y->A	nb	26771495	P
O15118	P87666	5f18-A	423	51	Y->A	0.03	26771495	N
O15118	n/a	5f18-A	424	52	P->G	0.18	26771495	N
O15118	n/a	5f18-A	424	52	P->A	0.34	26771495	N
P06730	Q13541	2gpq-A	73	73	W->A	n/a	22578813	P
O14745	P26038	2krg-A	355	355	F->R	n/a	15020681	P
P02829	P28707	1ah6-A	97	97	A->I	n/a	9632755	P
P02829	P28707	1ah6-A	170	170	G->D	n/a	9632755	P
P02829	P28707	1ah6-A	101	101	T->I	n/a	9632755	N
P48551	P01563	1n6u-A	73	46	M->A	3.68	10556041	P
P48551	P01563	1n6u-A	127	100	W->A	2.73	10556041	P
P48551	P01563	1n6u-A	73	46	M->A	2.32	21854986	P
P48551	P01563	1n6u-A	104	77	E->A	2.41	21854986	P
P48551	P01563	1n6u-A	107	80	V->A	2.32	21854986	P
P48551	P01563	1n6u-A	71	44	T->A	2.01	11698684	P
P48551	P01563	1n6u-A	74	47	S->A	0.47	10556041	N
P48551	P01563	1n6u-A	75	48	K->A	0.31	10556041	N
P48551	P01563	1n6u-A	77	50	E->A	0.2	10556041	N
P48551	P01563	1n6u-A	80	53	K->A	0.38	10556041	N
P48551	P01563	1n6u-A	101	74	S->A	0.31	10556041	N
P48551	P01563	1n6u-A	125	98	N->A	-0.21	10556041	N
P48551	P01563	1n6u-A	165	138	D->R	-0.06	10556041	N
P48551	P01563	1n6u-A	216	189	D->R	0.49	10556041	N
P48551	P01563	1n6u-A	216	189	D->A	-0.13	10556041	N
P48551	P01563	1n6u-A	217	190	E->A	0.16	10556041	N
P48551	P01563	1n6u-A	33	6	D->R	0.1	21854986	N
P48551	P01563	1n6u-A	36	9	D->R	0.03	21854986	N
P48551	P01563	1n6u-A	77	50	E->A	0.21	21854986	N
P48551	P01563	1n6u-A	78	51	D->A	0	21854986	N
P48551	P01563	1n6u-A	100	73	R->A	0.17	21854986	N
P48551	P01563	1n6u-A	101	74	S->A	0.27	21854986	N
P48551	P01563	1n6u-A	102	75	T->A	0.26	21854986	N
P48551	P01563	1n6u-A	124	97	H->A	0.04	21854986	N
P48551	P01563	1n6u-A	125	98	N->A	-0.13	21854986	N
P48551	P01563	1n6u-A	159	132	E->R	0	21854986	N
P48551	P01563	1n6u-A	165	138	D->R	-0.1	21854986	N
P48551	P01563	1n6u-A	214	187	H->A	0	21854986	N
P48551	P01563	1n6u-A	216	189	D->A	-0.1	21854986	N
P48551	P01563	1n6u-A	217	190	E->A	0.24	21854986	N
P48551	n/a	1n6u-A	55	28	E->R	0	21854986	N
P48551	n/a	1n6u-A	105	78	A->M	-0.17	21854986	N
P48551	n/a	1n6u-A	103	76	H->A	-0.6	21854986	N
P13726	P08709	1boy-A	92	60	T->A	2.3	7756258	P
P13726	P08709	1boy-A	90	58	D->A	>2	7654692	P
P13726	P08709	1boy-A	52	20	K->A	>2	7654692	P
P13726	P08709	1boy-A	52	20	K->A	2.5	7947809	P
P13726	P08709	1boy-A	76	44	D->A	2.2	7947809	P
P13726	P08709	1boy-A	77	45	W->A	2.5	7947809	P
P13726	P08709	1boy-A	172	140	F->A	2.3	7947809	P
P13726	P08709	1boy-A	83	51	Y->A	-0.1	7756258	N
P13726	P08709	1boy-A	126	94	Y->A	0.3	7756258	N
P13726	P08709	1boy-A	68	36	V->A	-0.1	7756258	N
P13726	P08709	1boy-A	70	38	I->A	-0.1	7756258	N
P13726	P08709	1boy-A	240	208	E->A	-0.005	7654692	N
P13726	P08709	1boy-A	239	207	V->A	-0.189	7654692	N
P13726	P08709	1boy-A	235	203	T->A	0.1352	7654692	N
P13726	P08709	1boy-A	227	195	S->A	-0.003	7654692	N
P13726	P08709	1boy-A	217	185	Y->A	-0.33	7654692	N
P13726	P08709	1boy-A	213	181	K->A	0.017	7654692	N
P13726	P08709	1boy-A	208	176	L->A	0.08	7654692	N
P13726	P08709	1boy-A	204	172	T->A	-0.03	7654692	N
P13726	P08709	1boy-A	201	169	K->A	0.117	7654692	N
P13726	P08709	1boy-A	199	167	T->A	0.212	7654692	N
P13726	P08709	1boy-A	196	164	G->R	-0.16	7654692	N
P13726	P08709	1boy-A	195	163	S->A	0.023	7654692	N
P13726	P08709	1boy-A	191	159	K->A	n/a	7654692	N
P13726	P08709	1boy-A	190	158	W->F	0.123	7654692	N
P13726	P08709	1boy-A	188	156	Y->L	0.155	7654692	N
P13726	P08709	1boy-A	184	152	I->A	0.179	7654692	N
P13726	P08709	1boy-A	177	145	D->A	-0.01	7654692	N
P13726	P08709	1boy-A	176	144	R->A	0	7654692	N
P13726	P08709	1boy-A	171	139	T->A	-0.02	7654692	N
P13726	P08709	1boy-A	167	135	R->A	n/a	7654692	N
P13726	P08709	1boy-A	165	133	L->A	-0.03	7654692	N
P13726	P08709	1boy-A	161	129	D->A	-0.03	7654692	N
P13726	P08709	1boy-A	160	128	E->A	0.086	7654692	N
P13726	P08709	1boy-A	154	122	K->A	-0.12	7654692	N
P13726	P08709	1boy-A	131	99	E->A	-0.18	7654692	N
P13726	P08709	1boy-A	126	94	Y->A	0.324	7654692	N
P13726	P08709	1boy-A	100	68	K->A	-0.07	7654692	N
P13726	P08709	1boy-A	84	52	T->A	0.405	7654692	N
P13726	P08709	1boy-A	82	50	F->A	0.43	7654692	N
P13726	P08709	1boy-A	74	42	S->A	-0.07	7654692	N
P13726	P08709	1boy-A	73	41	K->A	0.321	7654692	N
P13726	P08709	1boy-A	60	28	K->A	0.117	7654692	N
P13726	P08709	1boy-A	57	25	W->F	n/a	7654692	N
P13726	P08709	1boy-A	53	21	T->A	-0.16	7654692	N
P13726	P08709	1boy-A	50	18	N->A	0.18	7654692	N
P13726	P08709	1boy-A	49	17	T->A	0.12	7654692	N
P13726	n/a	1boy-A	79	47	S->A	-0.1	7756258	N
P13726	n/a	1boy-A	65	33	V->A	-0.2	7756258	N
P13726	n/a	1boy-A	124	92	P->A	-0.2	7756258	N
P13726	n/a	1boy-A	75	43	G->A	0.2	7756258	N
P13726	n/a	1boy-A	80	48	K->A	0.414	7654692	N
P13726	n/a	1boy-A	79	47	S->A	0.044	7654692	N
P13726	n/a	1boy-A	78	46	K->A	0.232	7654692	N
P13726	n/a	1boy-A	69	37	Q->A	n/a	7654692	N
P13726	n/a	1boy-A	58	26	E->A	0.101	7654692	N
P13726	n/a	1boy-A	56	24	E->A	n/a	7654692	N
P13726	n/a	1boy-A	47	15	K->A	-0.4	7654692	N
P13726	n/a	1boy-A	46	14	W->F	n/a	7654692	N
P13726	n/a	1boy-A	48	16	S->A	-0.12	8312277	N
P13726	n/a	1boy-A	91	59	L->A	0	8312277	N
P13726	n/a	1boy-A	93	61	D->A	0.241	8312277	N
P13726	n/a	1boy-A	94	62	E->A	0	8312277	N
P13726	n/a	1boy-A	95	63	I->A	0	8312277	N
P13726	n/a	1boy-A	96	64	V->A	0	8312277	N
P13726	n/a	1boy-A	101	69	Q->A	0	8312277	N
P13726	n/a	1boy-A	104	72	L->A	-0.05	8312277	N
P13726	n/a	1boy-A	137	105	E->A	-0.05	8312277	N
P13726	n/a	1boy-A	138	106	T->A	-0.05	8312277	N
P13726	n/a	1boy-A	139	107	N->A	0	8312277	N
P13726	n/a	1boy-A	163	131	R->A	0	8312277	N
P13726	n/a	1boy-A	164	132	T->A	0	8312277	N
P13726	n/a	1boy-A	168	136	R->A	-0.05	8312277	N
P13726	n/a	1boy-A	170	138	N->A	0	8312277	N
P13726	n/a	1boy-A	178	146	V->A	0.199	8312277	N
P13726	n/a	1boy-A	179	147	F->A	-0.05	8312277	N
P13726	n/a	1boy-A	189	157	Y->A	0	8312277	N
P13726	n/a	1boy-A	211	179	V->A	0.109	8312277	N
P13726	n/a	1boy-A	228	196	R->A	0.46	8312277	N
P13726	n/a	1boy-A	229	197	T->A	0.109	8312277	N
P13726	n/a	1boy-A	230	198	V->A	0.109	8312277	N
P13726	n/a	1boy-A	231	199	N->A	0	8312277	N
P43357	P04439	4v0p-A	170	170	D->A	n/a	8113684	P
P43357	P04439	4v0p-A	176	176	Y->A	n/a	8113684	P
O75475	P12497	1z9e-A	366	366	D->A	n/a	15895093	P
O75475	P12497	1z9e-A	406	406	F->A	n/a	15895093	P
O75475	P12497	1z9e-A	365	365	I->A	n/a	15895093	P
O75475	P12497	1z9e-A	366	366	D->N	n/a	15895093	P
O75475	P12497	1z9e-A	364	364	K->A	n/a	15895093	N
O75475	P12497	1z9e-A	373	373	C->A	n/a	15895093	N
O75475	P12497	1z9e-A	379	379	E->A	n/a	15895093	N
O75475	P12497	1z9e-A	383	383	L->A	n/a	15895093	N
O75475	P12497	1z9e-A	384	384	Q->A	n/a	15895093	N
O75475	P12497	1z9e-A	407	407	K->A	n/a	15895093	N
O75475	P12497	1z9e-A	413	413	M->A	n/a	15895093	N
O75475	P12497	1z9e-A	415	415	K->A	n/a	15895093	N
O75475	P12497	1z9e-A	367	367	N->A	n/a	15895093	N
O75475	P12497	1z9e-A	368	368	L->A	n/a	15895093	N
O75475	P12497	1z9e-A	369	369	D->A	n/a	15895093	N
O75475	P12497	1z9e-A	370	370	V->A	n/a	15895093	N
O75475	P12497	1z9e-A	371	371	N->A	n/a	15895093	N
O75475	P12497	1z9e-A	408	408	V->A	n/a	15895093	N
O75475	P12497	1z9e-A	411	411	V->A	n/a	15895093	N
O75475	P12497	1z9e-A	418	418	M->A	n/a	15895093	N
O75475	P12497	1z9e-A	354	354	R->A	n/a	15895093	N
O75475	P12497	1z9e-A	356	356	H->A	n/a	15895093	N
O75475	P12497	1z9e-A	360	360	K->A	n/a	15895093	N
O75475	P12497	1z9e-A	395	395	E->A	n/a	15895093	N
O75475	P12497	1z9e-A	402	402	K->A	n/a	15895093	N
O75475	P12497	1z9e-A	405	405	R->A	n/a	15895093	N
O75475	P12497	1z9e-A	420	420	Y->A	n/a	15895093	N
P01236	P16471	1rw5-A	208	180	H->A	2.04	20889499	P
P01236	P16471	1rw5-A	208	180	H->A	2.2	20889499	P
P01236	P16471	1rw5-A	208	180	H->A	2.03	20889499	P
P01236	P16471	1rw5-A	208	180	H->A	2.45	20889499	P
P01236	P16471	1rw5-A	208	180	H->A	2.27	20889499	P
P01236	P16471	1rw5-A	208	180	H->A	2.21	20889499	P
P01236	P16471	1rw5-A	55	27	H->A	-0.09	20889499	N
P01236	P16471	1rw5-A	55	27	H->A	-0.15	20889499	N
P01236	P16471	1rw5-A	55	27	H->A	-0.37	20889499	N
P01236	P16471	1rw5-A	55	27	H->A	-0.2	20889499	N
P01236	P16471	1rw5-A	55	27	H->A	-0.17	20889499	N
P01236	P16471	1rw5-A	55	27	H->A	-0.08	20889499	N
P01236	P16471	1rw5-A	55	27	H->A	0.13	20889499	N
P01236	P16471	1rw5-A	55	27	H->A	0.12	20889499	N
P01236	P16471	1rw5-A	55	27	H->A	0.29	20889499	N
P01236	P16471	1rw5-A	55	27	H->A	0.32	20889499	N
P01236	P16471	1rw5-A	58	30	H->A	-0.87	20889499	N
P01236	P16471	1rw5-A	58	30	H->A	-0.3	20889499	N
P01236	P16471	1rw5-A	58	30	H->A	-0.22	20889499	N
P01236	P16471	1rw5-A	58	30	H->A	0.09	20889499	N
P01236	P16471	1rw5-A	58	30	H->A	0.29	20889499	N
P01236	P16471	1rw5-A	58	30	H->A	0.28	20889499	N
P01236	P16471	1rw5-A	58	30	H->A	0.29	20889499	N
P01236	P16471	1rw5-A	58	30	H->A	0.36	20889499	N
P01236	P16471	1rw5-A	58	30	H->A	0.38	20889499	N
P01236	P16471	1rw5-A	58	30	H->A	0.32	20889499	N
P01236	n/a	1rw5-A	74	46	H->A	0.204	20889499	N
P01236	n/a	1rw5-A	87	59	H->A	0.033	20889499	N
P01236	n/a	1rw5-A	125	97	H->A	-0.06	20889499	N
P01236	n/a	1rw5-A	166	138	H->A	-0.39	20889499	N
P01236	n/a	1rw5-A	201	173	H->A	0.125	20889499	N
P01236	n/a	1rw5-A	223	195	H->A	-0.26	20889499	N
Q9BUL8	Q9BSQ5	3l8j-A	135	135	A->D	n/a	20489202	P
Q9BUL8	Q9BSQ5	3l8j-A	175	175	S->D	n/a	20489202	P
Q9ULZ3	Q9NX02	2kn6-A	13	13	E->W	n/a	15456791	P
Q9ULZ3	Q99575	2kn6-A	21	21	K->A	nb	18362139	P
Q9ULZ3	Q99575	2kn6-A	36	36	Y->A	nb	18362139	P
Q9ULZ3	Q9ULZ3	2kn6-A	19	19	E->A	n/a	15641782	P
Q9ULZ3	Q9ULZ3	2kn6-A	21	21	K->A	n/a	15641782	P
Q9ULZ3	Q9ULZ3	2kn6-A	21	21	K->Q	n/a	15641782	P
Q9ULZ3	Q9ULZ3	2kn6-A	21	21	K->E	n/a	15641782	P
Q9ULZ3	Q9ULZ3	2kn6-A	26	26	K->A	n/a	15641782	P
Q9ULZ3	Q9ULZ3	2kn6-A	26	26	K->Q	n/a	15641782	P
Q9ULZ3	Q9ULZ3	2kn6-A	41	41	R->A	n/a	15641782	P
Q9ULZ3	Q9ULZ3	2kn6-A	41	41	R->Q	n/a	15641782	P
Q9ULZ3	Q9ULZ3	2kn6-A	41	41	R->W	n/a	15641782	P
Q9ULZ3	Q9ULZ3	2kn6-A	48	48	D->A	n/a	15641782	P
Q9ULZ3	Q9ULZ3	2kn6-A	48	48	D->N	n/a	15641782	P
Q9ULZ3	Q9ULZ3	2kn6-A	48	48	D->E	n/a	15641782	P
Q9ULZ3	Q9ULZ3	2kn6-A	48	48	D->R	n/a	15641782	P
Q9ULZ3	Q9ULZ3	2kn6-A	51	51	D->A	n/a	15641782	P
Q9ULZ3	Q9ULZ3	2kn6-A	51	51	D->N	n/a	15641782	P
Q9ULZ3	Q9ULZ3	2kn6-A	51	51	D->K	n/a	15641782	P
Q9ULZ3	Q9ULZ3	2kn6-A	62	62	E->A	n/a	15641782	P
Q9ULZ3	Q9ULZ3	2kn6-A	67	67	E->A	n/a	15641782	P
Q9ULZ3	Q9ULZ3	2kn6-A	8	8	I->A	n/a	15641782	P
Q9ULZ3	Q9ULZ3	2kn6-A	12	12	L->A	n/a	15641782	P
Q9ULZ3	Q9ULZ3	2kn6-A	15	15	L->A	n/a	15641782	P
Q9ULZ3	Q9ULZ3	2kn6-A	20	20	L->A	n/a	15641782	P
Q9ULZ3	Q9ULZ3	2kn6-A	23	23	F->A	n/a	15641782	P
Q9ULZ3	Q9ULZ3	2kn6-A	25	25	L->A	n/a	15641782	P
Q9ULZ3	Q9ULZ3	2kn6-A	25	25	L->G	n/a	15641782	P
Q9ULZ3	Q9ULZ3	2kn6-A	25	25	L->Q	n/a	15641782	P
Q9ULZ3	Q9ULZ3	2kn6-A	25	25	L->N	n/a	15641782	P
Q9ULZ3	Q9ULZ3	2kn6-A	25	25	L->K	n/a	15641782	P
Q9ULZ3	Q9ULZ3	2kn6-A	25	25	L->E	n/a	15641782	P
Q9ULZ3	Q9ULZ3	2kn6-A	27	27	L->A	n/a	15641782	P
Q9ULZ3	Q9ULZ3	2kn6-A	40	40	P->A	n/a	15641782	P
Q9ULZ3	Q9ULZ3	2kn6-A	45	45	L->A	n/a	15641782	P
Q9ULZ3	Q9ULZ3	2kn6-A	47	47	M->A	n/a	15641782	P
Q9ULZ3	Q9ULZ3	2kn6-A	47	47	M->Q	n/a	15641782	P
Q9ULZ3	Q9ULZ3	2kn6-A	47	47	M->N	n/a	15641782	P
Q9ULZ3	Q9ULZ3	2kn6-A	52	52	L->A	n/a	15641782	P
Q9ULZ3	Q9ULZ3	2kn6-A	56	56	L->A	n/a	15641782	P
Q9ULZ3	Q9ULZ3	2kn6-A	68	68	L->A	n/a	15641782	P
Q9ULZ3	Q9ULZ3	2kn6-A	72	72	V->A	n/a	15641782	P
Q9ULZ3	Q9ULZ3	2kn6-A	76	76	M->A	n/a	15641782	P
Q9ULZ3	Q9ULZ3	2kn6-A	10	10	D->A	n/a	15641782	N
Q9ULZ3	Q9ULZ3	2kn6-A	22	22	K->A	n/a	15641782	N
Q9ULZ3	Q9ULZ3	2kn6-A	24	24	K->A	n/a	15641782	N
Q9ULZ3	Q9ULZ3	2kn6-A	33	33	R->A	n/a	15641782	N
Q9ULZ3	Q9ULZ3	2kn6-A	34	34	E->A	n/a	15641782	N
Q9ULZ3	Q9ULZ3	2kn6-A	38	38	R->A	n/a	15641782	N
Q9ULZ3	Q9ULZ3	2kn6-A	55	55	K->A	n/a	15641782	N
Q9ULZ3	Q9ULZ3	2kn6-A	74	74	R->A	n/a	15641782	N
Q9ULZ3	Q9ULZ3	2kn6-A	75	75	D->A	n/a	15641782	N
Q9ULZ3	Q9ULZ3	2kn6-A	80	80	E->A	n/a	15641782	N
Q9ULZ3	Q9ULZ3	2kn6-A	28	28	L->A	n/a	15641782	N
Q9ULZ3	Q9ULZ3	2kn6-A	30	30	V->A	n/a	15641782	N
Q9ULZ3	Q9ULZ3	2kn6-A	32	32	L->A	n/a	15641782	N
Q9ULZ3	Q9ULZ3	2kn6-A	44	44	L->A	n/a	15641782	N
Q9ULZ3	Q9ULZ3	2kn6-A	50	50	L->A	n/a	15641782	N
Q9ULZ3	Q9ULZ3	2kn6-A	57	57	V->A	n/a	15641782	N
Q9ULZ3	Q9ULZ3	2kn6-A	59	59	F->A	n/a	15641782	N
Q9ULZ3	Q9ULZ3	2kn6-A	61	61	L->A	n/a	15641782	N
Q9ULZ3	Q9ULZ3	2kn6-A	73	73	L->A	n/a	15641782	N
Q9ULZ3	Q9ULZ3	2kn6-A	81	81	M->A	n/a	15641782	N
Q9ULZ3	Q9ULZ3	2kn6-A	85	85	L->A	n/a	15641782	N
Q9ULZ3	n/a	2kn6-A	3	3	R->A	n/a	15641782	N
Q9ULZ3	n/a	2kn6-A	5	5	R->A	n/a	15641782	N
Q9ULZ3	n/a	2kn6-A	6	6	D->A	n/a	15641782	N
Q9ULZ3	n/a	2kn6-A	18	18	E->A	n/a	15641782	N
Q9ULZ3	n/a	2kn6-A	9	9	L->A	n/a	15641782	N
Q9ULZ3	n/a	2kn6-A	31	31	P->A	n/a	15641782	N
Q9ULZ3	n/a	2kn6-A	39	39	I->A	n/a	15641782	N
Q9ULZ3	n/a	2kn6-A	78	78	L->A	n/a	15641782	N
P60953	Q9BYG5	1aje-A	17	17	T->N	n/a	11260256	P
P60953	Q07960	1aje-A	32	32	Y->K	nb	9632678	P
P60953	n/a	1aje-A	12	12	G->V	n/a	11260256	N
P60953	n/a	1aje-A	38	38	D->E	0.39	9632678	N
Q07812	P10415	1f16-A	74	74	M->D	2.12	21199865	P
Q07812	P10415	1f16-A	74	74	M->E	2.18	21199865	P
Q07812	Q07820	1f16-A	74	74	M->D	2.62	21199865	P
Q07812	Q07820	1f16-A	74	74	M->E	2.12	21199865	P
P32797	P13382	1kxl-A	523	28	I->V	n/a	10898792	P
Q8VDF2	n/a	6vee-A	148	148	F->A	n/a	21489993	P
Q99828	n/a	1dgu-A	115	107	F->A	n/a	12023286	P
Q99828	n/a	1dgu-A	131	123	L->A	n/a	12023286	P
Q99828	n/a	1dgu-A	153	145	I->A	n/a	12023286	P
Q99828	n/a	1dgu-A	173	165	F->A	n/a	12023286	P
Q99828	n/a	1dgu-A	149	141	M->A	n/a	12023286	N
Q27974	P19120	1n4c-A	876	148	D->A	n/a	12741832	P
Q27974	P19120	1n4c-A	849	121	K->C	n/a	12741832	N
Q27974	P19120	1n4c-A	847	119	K->C	n/a	12741832	N
Q14790	Q9UKL3	6agw-A	73	73	D->A	n/a	15592525	P
Q96EP0	Q96BN8	4p09-A	82	82	Y->A	2.34	24726323	P
Q96EP0	Q96BN8	4p09-A	102	102	N->D	nb	24726323	P
Q96EP0	Q96BN8	4p09-A	102	102	N->Q	nb	24726323	P
Q96EP0	Q9UM82	4p09-A	102	102	N->A	n/a	27458237	P
O60493	Q96QK1	2mxc-A	22	22	Y->A	n/a	30213940	P
O60493	Q96QK1	2mxc-A	50	50	E->K	n/a	30213940	P
O60493	Q96QK1	2mxc-A	160	160	R->A	n/a	30213940	P
O60493	Q96QK1	2mxc-A	75	75	E->A	n/a	30213940	N
O60493	Q96QK1	2mxc-A	154	154	Y->A	n/a	30213940	N
O60493	n/a	2mxc-A	156	156	P->A	n/a	30213940	N
P01563	P48551	1itf-A	53	30	L->A	3.93	21854986	P
P01563	P48551	1itf-A	53	30	L->V	2.23	21854986	P
P01563	P48551	1itf-A	56	33	R->A	6.27	21854986	P
P01563	P48551	1itf-A	56	33	R->K	4.5	21854986	P
P01563	P48551	1itf-A	167	144	R->A	2.08	21854986	P
P01563	P48551	1itf-A	168	145	A->G	2.08	21854986	P
P01563	P48551	1itf-A	171	148	M->A	2.08	21854986	P
P01563	P48551	1itf-A	172	149	R->A	2.73	21854986	P
P01563	P48551	1itf-A	38	15	L->A	2	10984492	P
P01563	P48551	1itf-A	53	30	L->A	3.8	10984492	P
P01563	P48551	1itf-A	53	30	L->V	2.7	10984492	P
P01563	P48551	1itf-A	56	33	R->K	4.8	10984492	P
P01563	P48551	1itf-A	56	33	R->A	5.5	10984492	P
P01563	P48551	1itf-A	56	33	R->Q	6.2	10984492	P
P01563	P48551	1itf-A	167	144	R->A	2.2	10984492	P
P01563	P48551	1itf-A	168	145	A->G	2.2	10984492	P
P01563	P48551	1itf-A	171	148	M->A	2.4	10984492	P
P01563	P48551	1itf-A	172	149	R->A	3.2	10984492	P
P01563	P48551	1itf-A	39	16	M->A	0	21854986	N
P01563	P48551	1itf-A	47	24	I->A	-0.08	21854986	N
P01563	P48551	1itf-A	48	25	S->A	0	21854986	N
P01563	P48551	1itf-A	58	35	D->A	0.41	21854986	N
P01563	P48551	1itf-A	125	102	G->E	-0.02	21854986	N
P01563	P48551	1itf-A	129	106	T->E	0.02	21854986	N
P01563	P48551	1itf-A	135	112	K->N	-0.12	21854986	N
P01563	P48551	1itf-A	136	113	E->V	0.04	21854986	N
P01563	P48551	1itf-A	143	120	R->K	0.03	21854986	N
P01563	P48551	1itf-A	144	121	K->A	-0.08	21854986	N
P01563	P48551	1itf-A	148	125	R->A	0.28	21854986	N
P01563	P48551	1itf-A	154	131	K->A	0	21854986	N
P01563	P48551	1itf-A	155	132	E->A	-0.16	21854986	N
P01563	P48551	1itf-A	156	133	K->A	0.21	21854986	N
P01563	P48551	1itf-A	157	134	K->A	0.19	21854986	N
P01563	P48551	1itf-A	179	156	N->A	-0.01	21854986	N
P01563	P48551	1itf-A	48	25	S->A	0.3	10984492	N
P01563	n/a	1itf-A	42	19	A->W	-0.18	21854986	N
P01563	n/a	1itf-A	45	22	R->A	0.22	21854986	N
P01563	n/a	1itf-A	51	28	S->A	0	10556041	N
P01563	n/a	1itf-A	54	31	K->A	0.493	10556041	N
P01563	n/a	1itf-A	55	32	D->A	0.38	10556041	N
P01563	n/a	1itf-A	57	34	H->A	0.41	10556041	N
P01563	n/a	1itf-A	64	41	E->A	0	10556041	N
P01563	n/a	1itf-A	151	128	L->A	-0.06	10556041	N
P01563	n/a	1itf-A	63	40	Q->A	0.019	10984492	N
P01563	n/a	1itf-A	85	62	Q->A	0	16171819	N
P01563	n/a	1itf-A	87	64	F->A	0.17	16171819	N
P01563	n/a	1itf-A	88	65	N->A	0	16171819	N
P01563	n/a	1itf-A	91	68	S->A	0	16171819	N
P01563	n/a	1itf-A	92	69	T->A	0	16171819	N
P01563	n/a	1itf-A	93	70	K->A	0	16171819	N
P01563	n/a	1itf-A	96	73	S->A	0.17	16171819	N
P01563	n/a	1itf-A	102	79	T->A	0.17	16171819	N
P01563	n/a	1itf-A	103	80	L->A	0.302	16171819	N
P01563	n/a	1itf-A	106	83	K->A	0	16171819	N
P01563	n/a	1itf-A	108	85	Y->A	0.302	16171819	N
P01563	n/a	1itf-A	109	86	T->A	0.17	16171819	N
P01563	n/a	1itf-A	112	89	Y->A	0.302	16171819	N
P01563	n/a	1itf-A	113	90	Q->A	0.17	16171819	N
P01563	n/a	1itf-A	116	93	N->A	0.17	16171819	N
P01563	n/a	1itf-A	119	96	E->A	0.17	16171819	N
P24522	O14965	2kg4-A	77	77	L->E	n/a	20460379	P
P62937	Q13148	1oca-A	55	55	R->A	n/a	25678563	P
P62937	Q13148	1oca-A	125	125	K->R	n/a	25678563	P
P62937	Q13148	1oca-A	126	126	H->Q	n/a	21593166	P
P10415	Q07812	1g5m-A	145	145	G->E	n/a	8183370	P
P10415	Q07812	1g5m-A	145	145	G->A	n/a	8183370	P
P10415	Q07812	1g5m-A	188	188	W->A	n/a	8183370	P
P9WIA1	Q9UI12	2luo-A	146	146	L->A	n/a	22087003	P
P9WIA1	Q9UI12	2luo-A	126	126	D->A	n/a	22087003	N
Q13526	Q969H0	1nmv-A	34	34	W->A	n/a	22608923	P
Q13526	Q969H0	1nmv-A	63	63	K->A	n/a	22608923	P
O95760	Q01638	2kll-A	149	39	D->K	nb	23980170	P
O95760	Q01638	2kll-A	244	134	D->K	0.47	23980170	N
O95760	Q01638	2kll-A	163	53	Y->A	0.23	23980170	N
Q16832	n/a	2z4f-A	52	52	W->A	n/a	20004161	P
O43683	Q8NG31	2lah-A	106	116	A->D	n/a	17981135	P
O43683	Q8NG31	2lah-A	106	116	A->W	n/a	17981135	P
O43683	Q8NG31	2lah-A	122	132	L->G	n/a	17981135	P
O43683	O60566	2lah-A	130	140	A->S	n/a	19487456	P
O43791	n/a	2cr2-A	131	111	W->A	nb	19818708	P
O43791	O75367	2cr2-A	131	111	W->A	nb	19818708	P
Q14116	Q13478	1j0s-A	144	108	G->A	nb	25500532	P
Q14116	Q13478	1j0s-A	145	109	H->A	nb	25500532	P
Q14116	Q13478	1j0s-A	148	112	K->A	nb	25500532	P
Q14116	Q13478	1j0s-A	181	145	G->A	0.37	25500532	N
Q9NPD8	Q9NW38	1yh2-A	60	60	R->E	n/a	24389026	P
Q9NPD8	Q9NW38	1yh2-A	5	5	S->R	n/a	24389026	N
Q9NZN9	Q9Y5A7	5u9a-A	53	53	R->W	n/a	12374762	P
Q9NZN9	Q9Y5A7	5u9a-A	79	79	M->T	n/a	12374762	P
Q9NZN9	Q9Y5A7	5u9a-A	96	96	V->I	n/a	12374762	P
P68036	Q05086	6xxu-A	63	63	F->A	3	17433363	P
P68036	Q05086	6xxu-A	31	31	N->A	-0.18	17433363	N
P68036	Q05086	6xxu-A	52	52	R->A	-0.02	17433363	N
P68036	Q05086	6xxu-A	60	60	E->A	0.09	17433363	N
P68036	Q05086	6xxu-A	60	60	E->R	0.06	17433363	N
P68036	Q05086	6xxu-A	64	64	K->A	0.29	17433363	N
P68036	Q05086	6xxu-A	93	93	E->A	-0.43	17433363	N
P68036	Q05086	6xxu-A	93	93	E->R	-1	17433363	N
P68036	Q05086	6xxu-A	98	98	A->G	0.41	17433363	N
P68036	n/a	6xxu-A	6	6	R->A	0.46	17433363	N
P68036	n/a	6xxu-A	33	33	L->A	-0.36	17433363	N
O76064	Q14676	2csw-A	42	42	R->A	n/a	18001824	P
Q14019	n/a	1wnj-A	75	78	K->A	n/a	11583571	P
Q14019	P09917	1wnj-A	131	134	K->A	n/a	11297527	P
Q14019	P09917	1wnj-A	131	134	K->Q	n/a	11297527	P
P40515	P47025	1y8m-A	80	80	L->P	n/a	12163467	P
Q99816	n/a	1kpp-A	95	95	M->A	2.87	12006492	P
Q99816	n/a	1kpp-A	63	63	Y->A	-0.38	12006492	N
Q99816	n/a	1kpp-A	89	89	V->A	-2.05	12006492	N
Q99816	n/a	1kpp-A	141	141	V->A	-1.39	12006492	N
Q99816	n/a	1kpp-A	43	43	V->A	-1.92	12006492	N
Q99816	n/a	1kpp-A	44	44	F->A	-1.86	12006492	N
Q99816	n/a	1kpp-A	45	45	N->A	-1.77	12006492	N
Q99816	n/a	1kpp-A	46	46	D->A	-2.05	12006492	N
Q99816	n/a	1kpp-A	75	75	W->A	-1.86	12006492	N
Q99816	n/a	1kpp-A	88	88	F->A	-1.65	12006492	N
Q99816	n/a	1kpp-A	89	89	V->A	-0.33	12006492	N
Q99816	n/a	1kpp-A	141	141	V->A	0.3	12006492	N
Q99816	n/a	1kpp-A	43	43	V->A	0.33	12006492	N
Q99816	n/a	1kpp-A	44	44	F->A	-0.24	12006492	N
Q99816	n/a	1kpp-A	46	46	D->A	0.43	12006492	N
Q99816	n/a	1kpp-A	75	75	W->A	-0.28	12006492	N
Q99816	n/a	1kpp-A	88	88	F->A	0.4	12006492	N
Q99816	n/a	1kpp-A	63	63	Y->A	-3.82	12006492	N
Q99816	n/a	1kpp-A	89	89	V->A	-3.76	12006492	N
Q99816	n/a	1kpp-A	141	141	V->A	-3.56	12006492	N
Q99816	n/a	1kpp-A	43	43	V->A	-3.1	12006492	N
Q99816	n/a	1kpp-A	44	44	F->A	-3.56	12006492	N
Q99816	n/a	1kpp-A	45	45	N->A	-2.55	12006492	N
Q99816	n/a	1kpp-A	46	46	D->A	-2.81	12006492	N
Q99816	n/a	1kpp-A	75	75	W->A	-3.48	12006492	N
Q99816	n/a	1kpp-A	88	88	F->A	-3	12006492	N
P05230	Q96AG4	2rq9-A	133	113	K->E	n/a	11964394	P
Q7A260	P38446	1j57-A	24	32	E->A	5.47	17138564	P
Q7A260	P38446	1j57-A	24	32	E->Q	5.4	17138564	P
Q7A260	P38446	1j57-A	74	82	Q->A	3.23	17138564	P
Q7A260	P38446	1j57-A	75	83	D->E	5.43	17138564	P
Q7A260	P38446	1j57-A	75	83	D->N	5.9	17138564	P
Q7A260	P38446	1j57-A	76	84	W->A	4.07	17138564	P
Q9QUN3	P48025	2eo6-A	373	51	R->L	n/a	18369315	P
Q9P0R6	n/a	1sgo-A	42	42	N->I	n/a	27484798	P
Q9P0R6	P49841	1sgo-A	130	130	L->P	n/a	27484798	P
P15498	P43405	2crh-A	696	53	R->L	n/a	8986718	P
Q13951	Q01196	1cl3-A	104	104	N->A	2.11	10984496	P
Q13951	n/a	1cl3-A	58	58	V->A	0	12807883	N
Q13951	n/a	1cl3-A	65	65	S->A	0.114	12807883	N
Q53EL6	P60842	2ggf-A	358	358	H->A	2.21	19153607	P
Q53EL6	P60842	2ggf-A	373	373	E->A	0.43	19153607	N
Q53EL6	P60842	2ggf-A	403	403	R->A	0.05	19153607	N
Q14289	P62993	2lk4-A	881	11	Y->F	n/a	20521079	P
P05112	P24394	1bbn-A	147	127	K->A	2.77	9799097	P
P05112	P24394	1bbn-A	148	128	Y->A	2.58	9799097	P
P05112	P24394	1bbn-A	33	13	E->Q	3.12	9050834	P
P05112	P24394	1bbn-A	33	13	E->A	nb	9050834	P
P05112	P24394	1bbn-A	33	13	E->K	nb	9050834	P
P05112	P24394	1bbn-A	112	92	R->Q	2.83	9050834	P
P05112	P24394	1bbn-A	112	92	R->A	3.76	9050834	P
P05112	P24394	1bbn-A	112	92	R->D	nb	9050834	P
P05112	P24394	1bbn-A	113	93	N->R	nb	9050834	P
P05112	P24394	1bbn-A	29	9	I->A	0.23	9799097	N
P05112	P24394	1bbn-A	30	10	T->A	0.1	9799097	N
P05112	P24394	1bbn-A	32	12	Q->A	0.23	9799097	N
P05112	P24394	1bbn-A	37	17	T->A	0.06	9799097	N
P05112	P24394	1bbn-A	40	20	S->A	0.02	9799097	N
P05112	P24394	1bbn-A	43	23	E->A	-0.14	9799097	N
P05112	P24394	1bbn-A	139	119	R->A	-0.07	9799097	N
P05112	P24394	1bbn-A	141	121	K->A	0.41	9799097	N
P05112	P24394	1bbn-A	30	10	T->A	-0.08	9050834	N
P05112	P24394	1bbn-A	32	12	Q->A	0	9050834	N
P05112	P24394	1bbn-A	35	15	I->A	0.07	9050834	N
P05112	P24394	1bbn-A	36	16	K->S	-0.04	9050834	N
P05112	P24394	1bbn-A	39	19	N->A	-0.04	9050834	N
P05112	P24394	1bbn-A	40	20	S->A	-0.17	9050834	N
P05112	P24394	1bbn-A	43	23	E->A	-0.31	9050834	N
P05112	P24394	1bbn-A	101	81	K->A	0.16	9050834	N
P05112	P24394	1bbn-A	102	82	Q->A	0.13	9050834	N
P05112	P24394	1bbn-A	105	85	R->A	0.48	9050834	N
P05112	P24394	1bbn-A	106	86	F->A	-0.08	9050834	N
P05112	P24394	1bbn-A	108	88	K->A	0.35	9050834	N
P05112	P24394	1bbn-A	109	89	R->A	0.43	9050834	N
Q9UJY5	P84077	1oxz-A	182	182	L->A	n/a	15143060	P
Q9UJY5	P84077	1oxz-A	194	194	N->A	n/a	15143060	P
Q9UJY5	P84077	1oxz-A	197	197	I->A	n/a	15143060	P
Q9UJY5	P84077	1oxz-A	198	198	K->A	n/a	15143060	P
Q9UJY5	P84077	1oxz-A	200	200	M->A	n/a	15143060	P
Q9UJY5	P84077	1oxz-A	204	204	D->A	n/a	15143060	P
Q9UJY5	Q15276	1oxz-A	259	259	M->K	n/a	15143060	P
Q9UJY5	Q15276	1oxz-A	260	260	R->E	n/a	15143060	P
Q9UJY5	Q15276	1oxz-A	264	264	F->A	n/a	15143060	P
Q9UJY5	Q15276	1oxz-A	267	267	A->D	n/a	15143060	P
Q9UJY5	Q15276	1oxz-A	277	277	L->A	n/a	15143060	P
Q9UJY5	Q15276	1oxz-A	281	281	L->A	n/a	15143060	P
Q9UJY5	Q15276	1oxz-A	284	284	N->A	n/a	15143060	P
Q9UJY5	Q15276	1oxz-A	284	284	N->S	n/a	15143060	P
Q9UJY5	P84077	1oxz-A	205	205	Q->A	n/a	15143060	N
Q9UJY5	Q15276	1oxz-A	178	178	L->A	n/a	15143060	N
Q9UJY5	Q15276	1oxz-A	205	205	Q->A	n/a	15143060	N
Q9UJY5	Q15276	1oxz-A	246	246	E->R	n/a	15143060	N
Q9UJY5	Q15276	1oxz-A	255	255	R->Q	n/a	15143060	N
Q9UJY5	Q15276	1oxz-A	258	258	R->N	n/a	15143060	N
Q9UJY5	Q15276	1oxz-A	276	276	A->G	n/a	15143060	N
Q9UJY5	Q15276	1oxz-A	289	289	Q->R	n/a	15143060	N
Q9UJY5	n/a	1oxz-A	261	261	P->R	n/a	15143060	N
P73204	Q54714	3nph-B	26	9	R->E	n/a	21923764	P
P73204	Q54714	3nph-B	29	12	E->R	n/a	21923764	P
P73204	Q54714	3nph-B	31	14	E->R	n/a	21923764	P
P73204	Q54714	3nph-B	33	16	D->R	n/a	21923764	P
P73204	Q54714	3nph-B	41	24	R->E	n/a	21923764	P
P73204	Q54714	3nph-B	47	30	D->R	n/a	21923764	P
P73204	Q54714	3nph-B	48	31	H->Y	n/a	21923764	P
P73204	Q54714	3nph-B	54	37	R->E	n/a	21923764	P
Q9Z297	n/a	1n3k-A	74	74	D->A	n/a	12456656	P
Q9Z297	n/a	1n3k-A	121	121	I->R	n/a	12456656	P
Q9Z297	n/a	1n3k-A	121	121	I->A	n/a	12456656	P
Q9Z297	n/a	1n3k-A	123	123	L->R	n/a	12456656	P
Q9Z297	n/a	1n3k-A	123	123	L->A	n/a	12456656	P
Q9Z297	n/a	1n3k-A	128	128	K->E	n/a	12456656	P
Q9Z297	n/a	1n3k-A	128	128	K->A	n/a	12456656	P
Q9Z297	n/a	1n3k-A	129	129	K->E	n/a	12456656	P
Q9Z297	n/a	1n3k-A	129	129	K->A	n/a	12456656	P
Q9Z297	n/a	1n3k-A	13	13	N->R	n/a	12456656	N
Q9Z297	n/a	1n3k-A	14	14	N->R	n/a	12456656	N
Q9Z297	n/a	1n3k-A	16	16	T->R	n/a	12456656	N
Q9Z297	n/a	1n3k-A	18	18	E->R	n/a	12456656	N
Q9Z297	n/a	1n3k-A	22	22	Q->A	n/a	12456656	N
Q9Z297	n/a	1n3k-A	25	25	S->E	n/a	12456656	N
Q9Z297	n/a	1n3k-A	34	34	E->R	n/a	12456656	N
Q9Z297	n/a	1n3k-A	40	40	T->R	n/a	12456656	N
Q9Z297	n/a	1n3k-A	50	50	E->R	n/a	12456656	N
Q9Z297	n/a	1n3k-A	61	61	S->R	n/a	12456656	N
Q9Z297	n/a	1n3k-A	64	64	E->A	n/a	12456656	N
Q9Z297	n/a	1n3k-A	71	71	R->A	n/a	12456656	N
Q9Z297	n/a	1n3k-A	72	72	R->A	n/a	12456656	N
Q9Z297	n/a	1n3k-A	77	77	T->A	n/a	12456656	N
Q9Z297	n/a	1n3k-A	78	78	M->R	n/a	12456656	N
Q9Z297	n/a	1n3k-A	81	81	D->A	n/a	12456656	N
Q9Z297	n/a	1n3k-A	85	85	R->A	n/a	12456656	N
Q9Z297	n/a	1n3k-A	114	114	Q->R	n/a	12456656	N
Q9Z297	n/a	1n3k-A	118	118	E->R	n/a	12456656	N
Q9Z297	n/a	1n3k-A	119	119	E->R	n/a	12456656	N
Q9Z297	n/a	1n3k-A	120	120	I->R	n/a	12456656	N
Q9Z297	n/a	1n3k-A	122	122	K->E	n/a	12456656	N
Q9Z297	n/a	1n3k-A	6	6	T->R	n/a	12456656	N
Q9Z297	n/a	1n3k-A	9	9	Q->R	n/a	12456656	N
Q9Z297	n/a	1n3k-A	29	29	E->A	n/a	12456656	N
Q9Z297	n/a	1n3k-A	56	56	D->A	n/a	12456656	N
Q9Z297	n/a	1n3k-A	65	65	H->A	n/a	12456656	N
Q9Z297	n/a	1n3k-A	124	124	A->R	n/a	12456656	N
P25445	Q13158	1ddf-A	261	245	E->K	n/a	20935634	P
P25445	Q13158	1ddf-A	272	256	E->K	n/a	20935634	P
P25445	Q13158	1ddf-A	270	254	T->K	n/a	20935634	P
P25445	Q13158	1ddf-A	250	234	R->E	n/a	20935634	P
P25445	Q13158	1ddf-A	283	267	Q->K	n/a	20935634	P
P25445	Q13158	1ddf-A	287	271	K->D	n/a	20935634	P
P25445	Q13158	1ddf-A	305	289	T->K	n/a	20935634	N
P25445	Q13158	1ddf-A	302	286	N->K	n/a	20935634	N
Q01196	Q13951	1co1-A	106	66	M->V	n/a	19202074	P
Q01196	Q13951	1co1-A	107	67	A->T	n/a	19202074	P
Q01196	Q13951	1co1-A	109	69	N->A	2.22	12807883	P
Q01196	Q13951	1co1-A	161	121	T->A	2	12807883	P
Q01196	Q13951	1co1-A	140	100	S->G	n/a	19202074	N
Q01196	Q13951	1co1-A	66	26	D->A	-0.32	12807883	N
Q01196	Q13951	1co1-A	159	119	V->A	-0.04	12807883	N
Q01196	n/a	1co1-A	142	102	R->A	-0.19	11257229	N
Q01196	n/a	1co1-A	144	104	K->M	0.319	11257229	N
P01033	P03956	1d2b-A	25	2	T->L	2.68	12515831	P
P01033	P03956	1d2b-A	25	2	T->R	5.04	12515831	P
P01033	P03956	1d2b-A	91	68	S->A	2.11	12515831	P
P01033	P03956	1d2b-A	91	68	S->E	2.18	12515831	P
P01033	P03956	1d2b-A	91	68	S->R	2.83	12515831	P
P01033	P03956	1d2b-A	91	68	S->Y	2.98	12515831	P
P01033	P08253	1d2b-A	91	68	S->R	2.25	12515831	P
P01033	P08254	1d2b-A	25	2	T->R	2.37	12515831	P
P01033	P08254	1d2b-A	91	68	S->A	3.01	12515831	P
P01033	P08254	1d2b-A	91	68	S->E	2.52	12515831	P
P01033	P08254	1d2b-A	91	68	S->R	3.26	12515831	P
P01033	P08254	1d2b-A	25	2	T->A	2.73	9268350	P
P01033	P08254	1d2b-A	61	38	Y->A	3.54	9268350	P
P01033	P08254	1d2b-A	93	70	C->S	4.81	9268350	P
P01033	P03956	1d2b-A	27	4	V->A	0	12515831	N
P01033	P08253	1d2b-A	27	4	V->A	0.13	12515831	N
P01033	P08253	1d2b-A	27	4	V->I	-0.17	12515831	N
P01033	P08253	1d2b-A	27	4	V->S	0	12515831	N
P01033	P08254	1d2b-A	27	4	V->A	-0.41	12515831	N
P01033	P08254	1d2b-A	27	4	V->I	0	12515831	N
P01033	P08254	1d2b-A	39	16	D->N	0.34	9268350	N
P01033	P08254	1d2b-A	41	18	V->A	0.47	9268350	N
P01033	P08254	1d2b-A	45	22	K->A	-0.47	9268350	N
P01033	P08254	1d2b-A	45	22	K->R	0.04	9268350	N
P01033	n/a	1d2b-A	28	5	P->A	-0.14	9268350	N
P09038	P11362	1bfg-A	238	96	E->A	4.37	7665610	P
P09038	P11362	1bfg-A	238	96	E->K	3.3	7665610	P
P09038	P11362	1bfg-A	166	24	Y->A	2.89	7929426	P
P09038	P11362	1bfg-A	245	103	Y->A	3.09	7929426	P
P09038	P11362	1bfg-A	282	140	L->A	3.55	7929426	P
P09038	P11362	1bfg-A	251	109	R->A	0.22	7665610	N
P09038	P11362	1bfg-A	252	110	K->A	-0.33	7665610	N
P09038	P11362	1bfg-A	253	111	Y->F	-0.09	7665610	N
P09038	P11362	1bfg-A	256	114	W->F	0.35	7665610	N
P09038	P11362	1bfg-A	239	97	R->A	0.41	7665610	N
P09038	P11362	1bfg-A	164	22	R->A	0.18	7929426	N
P09038	P11362	1bfg-A	188	46	K->A	0.07	7929426	N
P09038	P11362	1bfg-A	251	109	R->T	0.08	7929426	N
P09038	P11362	1bfg-A	252	110	K->E	0.29	7929426	N
P09038	P11362	1bfg-A	253	111	Y->A	0.17	7929426	N
P09038	P11362	1bfg-A	254	112	T->A	0.15	7929426	N
P09038	P11362	1bfg-A	255	113	S->A	0.06	7929426	N
P09038	P11362	1bfg-A	256	114	W->A	0.13	7929426	N
P09038	n/a	1bfg-A	164	22	R->A	0.02	7929426	N
P09038	n/a	1bfg-A	173	31	F->A	0.37	7929426	N
P09038	n/a	1bfg-A	186	44	R->A	0.25	7929426	N
P09038	n/a	1bfg-A	188	46	K->A	0.17	7929426	N
P09038	n/a	1bfg-A	243	101	N->A	0.24	7929426	N
P09038	n/a	1bfg-A	284	142	M->A	0.07	7929426	N
P09038	n/a	1bfg-A	251	109	R->T	-0.09	7929426	N
P09038	n/a	1bfg-A	252	110	K->E	-0.09	7929426	N
P09038	n/a	1bfg-A	253	111	Y->A	0.11	7929426	N
P09038	P11362	1bfg-A	254	112	T->A	-0.17	7929426	N
P09038	n/a	1bfg-A	255	113	S->A	0.01	7929426	N
P09038	n/a	1bfg-A	256	114	W->A	-0.08	7929426	N
P09038	n/a	1bfg-A	168	26	K->A	0.01	7929426	N
P34152	Q60631	1k40-A	925	925	Y->F	n/a	7997267	P
P34152	P97433	1k40-A	1034	1034	L->S	n/a	12702722	P
P40075	n/a	6lp4-A	40	40	K->N	2.08	15668246	P
P40075	n/a	6lp4-A	42	42	T->A	2.32	15668246	P
P40075	n/a	6lp4-A	122	122	K->N	0.41	15668246	N
P40075	n/a	6lp4-A	82	82	R->N	0.41	15668246	N
O14907	P48050	2kg2-A	20	20	K->A	n/a	16855024	P
O14907	P48050	2kg2-A	90	90	H->A	n/a	16855024	P
O94888	P55072	1wj4-A	459	90	P->G	n/a	22537386	P
Q9JI78	Q01853	2d5u-A	41	46	N->P	n/a	16709668	P
Q9JI78	Q01853	2d5u-A	58	63	N->A	n/a	16709668	N
P03950	P13489	5eop-A	29	5	R->A	n/a	10413501	P
P03950	P13489	5eop-A	64	40	K->Q	n/a	10413501	P
P03950	P13489	5eop-A	64	40	K->G	3.2	10413501	P
P03950	n/a	5eop-A	36	12	Q->A	0.3	9050852	N
P03950	n/a	5eop-A	92	68	N->A	0.117	9050852	N
P03950	n/a	5eop-A	132	108	E->A	-0.32	9050852	N
P03950	n/a	5eop-A	108	84	H->A	0.17	10970748	N
P03950	n/a	5eop-A	113	89	W->A	0.24	10970748	N
P03950	n/a	5eop-A	90	66	R->A	0.202	1281426	N
P03950	n/a	5eop-A	94	70	R->A	-0.23	1281426	N
P03950	n/a	5eop-A	55	31	R->A	0.25	1281426	N
P03950	n/a	5eop-A	57	33	R->A	0.326	1281426	N
P03950	n/a	5eop-A	37	13	H->A	-0.29	2479414	N
P35189	P61830	2l7e-A	80	80	G->K	n/a	27089029	P
P35189	P61830	2l7e-A	80	80	G->L	n/a	27089029	P
P35189	P61830	2l7e-A	80	80	G->M	n/a	27089029	P
P35189	P61830	2l7e-A	81	81	W->A	n/a	26341557	P
P35189	P61830	2l7e-A	24	24	V->L	n/a	27089029	N
P51532	n/a	2grc-A	1539	1539	F->A	n/a	17274598	P
P51532	n/a	2grc-A	1540	1540	N->A	n/a	17274598	P
P51532	n/a	2grc-A	1488	1488	L->A	n/a	17274598	N
P51532	n/a	2grc-A	1538	1538	T->A	n/a	17274598	N
P78543	Q9UIV1	3dju-B	65	65	Y->A	n/a	18974182	P
P78543	Q9UIV1	3dju-B	103	103	W->A	n/a	18974182	P
P78543	Q9UIV1	3dju-B	105	105	D->A	n/a	18974182	P
P78543	Q9UIV1	3dju-B	65	65	Y->A	n/a	23236473	P
P78543	Q9UIV1	3dju-B	75	75	D->A	n/a	23236473	P
P78543	Q9UIV1	3dju-B	103	103	W->A	n/a	23236473	P
P78543	Q9UIV1	3dju-B	105	105	D->A	n/a	23236473	P
P78543	Q9UIV1	3dju-B	115	115	E->A	n/a	18974182	N
P78543	Q9UIV1	3dju-B	53	53	H->A	n/a	23236473	N
P78543	Q9UIV1	3dju-B	108	108	E->A	n/a	23236473	N
P78543	Q9UIV1	3dju-B	115	115	E->A	n/a	23236473	N
Q13241	P13747	1b6e-A	112	112	Q->A	nb	18083576	P
Q13241	P13747	1b6e-A	114	114	F->A	nb	18083576	P
Q13241	P13747	1b6e-A	160	160	N->A	nb	18083576	P
Q13241	P13747	1b6e-A	162	162	L->A	nb	18083576	P
Q13241	P13747	1b6e-A	79	79	Q->A	-0.11	18083576	N
Q13241	P13747	1b6e-A	146	146	T->A	0	18083576	N
Q13241	P13747	1b6e-A	148	148	N->A	-0.28	18083576	N
Q13241	P13747	1b6e-A	158	158	N->A	-0.7	18083576	N
P22892	P42567	1gyu-A	753	753	A->D	n/a	12176391	P
P22892	P42567	1gyu-A	762	762	L->E	n/a	12176391	P
P22892	n/a	1gyu-A	728	728	P->S	n/a	12176391	N
P22892	n/a	1gyu-A	765	765	P->N	n/a	12176391	N
Q8N0X7	P53990	2dl1-A	24	23	F->D	n/a	20719964	P
P16471	P01236	2lfg-A	212	188	H->A	2.24	20889499	P
P16471	P01236	2lfg-A	212	188	H->A	2.59	20889499	P
P16471	P01236	2lfg-A	212	188	H->A	2.63	20889499	P
P16471	P01236	2lfg-A	212	188	H->A	2.66	20889499	P
P16471	P01236	2lfg-A	212	188	H->A	2.7	20889499	P
P16471	P01236	2lfg-A	212	188	H->A	2.64	20889499	P
P16471	P01236	2lfg-A	212	188	H->A	2.64	20889499	P
P16471	P01236	2lfg-A	212	188	H->A	2.7	20889499	P
P35225	P78552	1ga3-A	47	14	I->A	3.1	20223216	P
P35225	P78552	1ga3-A	66	33	M->A	2.33	20223216	P
P35225	P78552	1ga3-A	137	104	K->A	3.23	20223216	P
P35225	P78552	1ga3-A	140	107	F->A	2.42	20223216	P
P35225	P78552	1ga3-A	141	108	R->A	2.86	20223216	P
P35225	Q14627	1ga3-A	47	14	I->A	3.72	20223216	P
P35225	Q14627	1ga3-A	134	101	L->A	5.81	20223216	P
P35225	Q14627	1ga3-A	137	104	K->A	2.54	20223216	P
P35225	Q14627	1ga3-A	138	105	K->A	5.11	20223216	P
P35225	P78552	1ga3-A	44	11	R->A	0.26	20223216	N
P35225	P78552	1ga3-A	48	15	E->A	-0.04	20223216	N
P35225	P78552	1ga3-A	51	18	V->A	-0.13	20223216	N
P35225	P78552	1ga3-A	120	87	D->A	0.29	20223216	N
P35225	P78552	1ga3-A	121	88	T->A	0.02	20223216	N
P10600	P37173	1tgk-A	394	94	R->K	2.3	19161338	P
P10600	P37173	1tgk-A	394	94	R->A	3	19161338	P
P10600	P37173	1tgk-A	392	92	V->I	0.34	19161338	N
Q14203	P30622	2coy-A	68	75	K->A	n/a	17828275	P
Q14203	P30622	2coy-A	90	97	R->E	n/a	17828275	P
P56279	P31751	1jsg-A	16	16	D->G	n/a	11839817	P
P56279	P31751	1jsg-A	16	16	D->G	n/a	11839817	P
P56279	P31751	1jsg-A	74	74	I->V	n/a	11839817	P
P56279	P31751	1jsg-A	30	30	K->M	n/a	11839817	N
P56279	P31751	1jsg-A	46	46	Q->R	n/a	11839817	N
P56279	P31751	1jsg-A	106	106	M->V	n/a	11839817	N
P56279	P31751	1jsg-A	30	30	K->M	n/a	11839817	N
P56279	P31751	1jsg-A	46	46	Q->R	n/a	11839817	N
P56279	P31751	1jsg-A	106	106	M->V	n/a	11839817	N
P00648	P11540	1bnr-A	74	27	K->A	5.4	7739054	P
P00648	P11540	1bnr-A	106	59	R->A	5.2	7739054	P
P00648	P11540	1bnr-A	130	83	R->Q	5.4	7739054	P
P00648	P11540	1bnr-A	134	87	R->A	5.5	7739054	P
P00648	P11540	1bnr-A	149	102	H->A	6.1	7739054	P
P00648	P11540	1bnr-A	74	27	K->A	5.4	8494892	P
P00648	P11540	1bnr-A	105	58	N->A	3.1	8494892	P
P00648	P11540	1bnr-A	106	59	R->A	5.2	8494892	P
P00648	P11540	1bnr-A	134	87	R->A	6	8494892	P
P00648	P11540	1bnr-A	149	102	H->A	6.3	8494892	P
P00648	P11540	1bnr-A	106	59	R->K	2.49	8507637	P
P00648	P11540	1bnr-A	106	59	R->A	4.63	8507637	P
P00648	P11540	1bnr-A	149	102	H->Q	4.55	8507637	P
P00648	P11540	1bnr-A	149	102	H->D	4.55	8507637	P
P00648	P11540	1bnr-A	149	102	H->G	6.82	8507637	P
P00648	P11540	1bnr-A	149	102	H->A	6.91	8507637	P
P00648	P11540	1bnr-A	149	102	H->L	7.66	8507637	P
P00648	P11540	1bnr-A	149	102	H->A	6.1	9126847	P
P00648	P11540	1bnr-A	106	59	R->A	5.2	9126847	P
P00648	P11540	1bnr-A	74	27	K->A	5.4	9126847	P
P00648	P11540	1bnr-A	134	87	R->A	5.5	9126847	P
P00648	P11540	1bnr-A	120	73	E->Y	2.4	9126847	P
P00648	P11540	1bnr-A	120	73	E->F	2.4	9126847	P
P00648	P11540	1bnr-A	120	73	E->C	2.5	9126847	P
P00648	P11540	1bnr-A	120	73	E->S	3	9126847	P
P00648	P11540	1bnr-A	120	73	E->A	2.3	9126847	P
P00648	P11540	1bnr-A	101	54	D->A	-0.8	8494892	N
P00648	P11540	1bnr-A	107	60	E->A	-0.2	8494892	N
O15357	Q08999	2mk2-A	47	39	R->G	n/a	11158326	P
P32851	P61765	2m8r-A	233	233	I->A	3.24	18337752	P
Q84Y95	Q84W65	3ipz-A	97	97	C->S	n/a	24203231	P
O60885	n/a	2i8n-A	433	82	N->A	n/a	22464331	P
P20783	Q16288	1nt3-A	241	103	R->A	2.61	7529173	P
P20783	Q16288	1nt3-A	241	103	R->K	2.82	7529173	P
P20783	P17643	1nt3-A	206	68	R->A	2.83	7529173	P
P20783	P17643	1nt3-A	149	11	Y->A	2.4	7529173	P
P20783	Q16288	1nt3-A	153	15	D->A	-0.22	7529173	N
P20783	Q16288	1nt3-A	162	24	K->A	0.12	7529173	N
P20783	Q16288	1nt3-A	176	38	L->E	0.13	7529173	N
P20783	Q16288	1nt3-A	227	89	L->E	0.1	7529173	N
P20783	Q16288	1nt3-A	235	97	V->E	0.25	7529173	N
P20783	Q16288	1nt3-A	171	33	H->A	0.09	7529173	N
P20783	P17643	1nt3-A	153	15	D->A	0	7529173	N
P20783	P17643	1nt3-A	160	22	T->Q	-0.08	7529173	N
P20783	P17643	1nt3-A	192	54	E->A	0.2	7529173	N
P20783	P17643	1nt3-A	194	56	R->A	0.35	7529173	N
P20783	P17643	1nt3-A	201	63	V->A	-0.21	7529173	N
P20783	P17643	1nt3-A	235	97	V->E	0.17	7529173	N
P20783	P17643	1nt3-A	171	33	H->A	0.41	7529173	N
Q9Y239	O43353	2dbd-A	41	32	V->A	n/a	17054981	P
Q9Y239	O43353	2dbd-A	53	44	E->K	n/a	17054981	P
Q9Y239	O43353	2dbd-A	54	45	D->K	n/a	17054981	P
Q9Y239	O43353	2dbd-A	56	47	E->K	n/a	17054981	P
Q9Y239	O43353	2dbd-A	69	60	R->E	n/a	17054981	P
Q9Y239	O43353	2dbd-A	40	31	L->A	n/a	17054981	N
Q9Y239	O43353	2dbd-A	42	33	D->K	n/a	17054981	N
Q9Y239	O43353	2dbd-A	44	35	L->A	n/a	17054981	N
Q9Y239	O43353	2dbd-A	48	39	D->K	n/a	17054981	N
Q9Y239	O43353	2dbd-A	52	43	A->S	n/a	17054981	N
Q9Y239	O43353	2dbd-A	57	48	I->A	n/a	17054981	N
Q9Y239	O43353	2dbd-A	67	58	K->A	n/a	17054981	N
O43353	Q9Y239	2n7z-A	444	11	R->E	n/a	17054981	P
O43353	Q9Y239	2n7z-A	483	50	R->E	n/a	17054981	P
O43353	Q9Y239	2n7z-A	488	55	R->E	n/a	17054981	P
O43353	Q9Y239	2n7z-A	480	47	K->E	n/a	17054981	N
O43353	Q9Y239	2n7z-A	448	15	V->A	n/a	17054981	N
O43353	Q9Y239	2n7z-A	469	36	I->A	n/a	17054981	N
O43353	Q9Y239	2n7z-A	500	67	E->A	n/a	17054981	N
O43353	n/a	2n7z-A	481	48	P->A	n/a	17054981	N
P06729	P19256	1cdb-A	67	43	K->R	n/a	2444890	P
P06729	P19256	1cdb-A	70	46	Q->K	n/a	2444890	P
P06729	P19256	1cdb-A	110	86	Y->D	n/a	2444890	P
P06729	P19256	1cdb-A	111	87	D->H	n/a	2444890	P
P08887	P05231	2arw-A	217	7	D->V	n/a	8467812	P
P08887	P05231	2arw-A	279	69	I->D	n/a	8467812	P
P08887	P05231	2arw-A	291	81	Q->K	n/a	8467812	P
P08887	P05231	2arw-A	293	83	R->G	n/a	8467812	P
P08887	P05231	2arw-A	232	22	R->S	n/a	8467812	N
P08887	P05231	2arw-A	233	23	W->Q	n/a	8467812	N
P08887	P05231	2arw-A	254	44	E->A	n/a	8467812	N
P08887	P05231	2arw-A	277	67	C->D	n/a	8467812	N
P08887	P05231	2arw-A	278	68	V->N	n/a	8467812	N
P0CG48	P15374	2k25-A	682	82	R->L	2.46	10518943	P
P0CG48	P15374	2k25-A	616	16	L->A	2.77	10518943	P
P0CG48	P15374	2k25-A	635	35	K->A	-0.06	10518943	N
P0CG48	P15374	2k25-A	650	50	R->L	-0.89	10518943	N
P0CG48	P15374	2k25-A	676	76	H->N	0	10518943	N
P0CG48	P15374	2k25-A	632	32	E->A	-0.25	10518943	N
P0CG48	P15374	2k25-A	647	47	D->A	-0.43	10518943	N
P0CG48	P15374	2k25-A	660	60	D->A	-0.25	10518943	N
P0CG48	P15374	2k25-A	614	14	K->R	0.31	10518943	N
P0CG48	P15374	2k25-A	635	35	K->R	0.28	10518943	N
P0CG48	P15374	2k25-A	641	41	K->R	0	10518943	N
P0CG48	P15374	2k25-A	652	52	I->A	0.28	10518943	N
P63165	O75928	1a5r-A	36	36	F->A	n/a	16204249	P
Q8K4V4	Q63511	3qdo-A	51	51	Y->L	n/a	21422294	P
Q8K4V4	Q63511	3qdo-A	56	56	R->A	n/a	21422294	P
Q8K4V4	Q64273	3qdo-A	51	51	Y->L	n/a	21422294	P
Q8K4V4	Q64273	3qdo-A	56	56	R->A	n/a	21422294	P
Q8K4V4	Q64273	3qdo-A	81	81	A->K	n/a	21422294	P
Q8K4V4	Q64273	3qdo-A	101	101	E->A	n/a	21422294	P
Q8K4V4	Q64273	3qdo-A	109	109	G->D	n/a	21422294	P
Q8K4V4	Q64273	3qdo-A	113	113	K->E	n/a	21422294	P
Q7Z2E3	Q14676	3kt9-A	43	29	R->A	n/a	20008512	P
Q7Z2E3	Q14676	3kt9-A	52	38	K->A	n/a	20008512	P
Q7Z434	n/a	2ms8-A	54	54	T->A	n/a	17709747	P
Q14596	n/a	1wj6-A	50	60	D->R	n/a	12813044	P
Q14596	n/a	1wj6-A	12	22	K->A	n/a	12813044	N
P07567	n/a	2f76-X	57	57	R->F	n/a	18647839	P
P71590	P9WJK3	2lc1-A	474	47	R->A	2.26	22275220	P
P71590	P9WJK3	2lc1-A	459	32	R->A	3.05	22275220	P
P71590	P9WJK3	2lc1-A	461	34	Q->A	-0.05	22275220	N
P54762	Q14451	2eao-A	928	37	Y->F	n/a	12223469	P
O95786	Q7Z434	2lwd-A	172	172	K->R	n/a	17392790	P
Q14315	Q14315	1v05-A	2669	2669	M->D	n/a	15642266	P
P55265	Q92973	2mdr-A	801	801	R->A	n/a	24753571	P
O43639	Q14185	1wx6-A	234	54	W->K	n/a	11240126	P
P78560	Q9HB75	2o71-A	121	121	N->D	n/a	17289572	P
P78560	Q9HB75	2o71-A	125	125	Q->A	n/a	17289572	P
P78560	Q9HB75	2o71-A	169	169	Q->E	n/a	17289572	P
P78560	Q9HB75	2o71-A	146	146	Y->A	n/a	17289572	P
P78560	Q9HB75	2o71-A	147	147	R->A	n/a	17289572	P
P78560	Q9HB75	2o71-A	147	147	R->E	n/a	17289572	P
P78560	Q9HB75	2o71-A	149	149	K->E	n/a	17289572	P
P78560	Q9HB75	2o71-A	156	156	V->D	n/a	17289572	P
Q96QB1	P68104	2dky-A	475	45	F->G	n/a	19158340	P
Q96QB1	P68104	2dky-A	476	46	L->G	n/a	19158340	P
Q96QB1	P68104	2dky-A	477	47	F->G	n/a	19158340	N
P0AAM3	P16431	2ot2-A	2	2	C->A	n/a	10783387	P
P0AAM3	P16431	2ot2-A	2	2	C->R	n/a	10783387	P
P0AAM3	P16431	2ot2-A	2	2	C->S	n/a	10783387	P
P11540	P00648	1bta-A	30	29	Y->A	3.4	7739054	P
P11540	P00648	1bta-A	36	35	D->A	4.5	7739054	P
P11540	P00648	1bta-A	40	39	D->A	7.7	7739054	P
P11540	P00648	1bta-A	45	44	W->F	0	7739054	N
P41743	Q13501	1vd2-A	72	63	D->A	n/a	15143057	P
P41743	Q13501	1vd2-A	29	20	K->A	n/a	15143057	N
O95429	P11142	1m62-A	424	424	D->A	n/a	12058034	P
O95429	P11142	1m62-A	446	446	Q->A	n/a	12058034	P
O95429	P11142	1m62-A	414	414	E->A	n/a	12058034	N
O95429	P11142	1m62-A	453	453	E->A	n/a	12058034	N
P13479	P09883	1e0h-A	33	33	L->A	3.42	9425068	P
P13479	P09883	1e0h-A	34	34	V->A	2.58	9425068	P
P13479	P09883	1e0h-A	41	41	E->A	2.08	9425068	P
P13479	P09883	1e0h-A	50	50	S->A	2.19	9425068	P
P13479	P09883	1e0h-A	51	51	D->A	5.92	9425068	P
P13479	P09883	1e0h-A	54	54	Y->A	4.83	9425068	P
P13479	P09883	1e0h-A	55	55	Y->A	4.63	9425068	P
P13479	P09883	1e0h-A	24	24	N->A	0.14	9425068	N
P13479	P09883	1e0h-A	26	26	D->A	0.34	9425068	N
P13479	P09883	1e0h-A	28	28	S->A	0.17	9425068	N
P13479	P09883	1e0h-A	31	31	E->A	0.31	9425068	N
P13479	P09883	1e0h-A	32	32	E->A	0.22	9425068	N
P13479	P09883	1e0h-A	35	35	K->A	0.19	9425068	N
P13479	P09883	1e0h-A	44	44	T->A	0.3	9425068	N
P13479	P09883	1e0h-A	45	45	E->A	0.21	9425068	N
P13479	P09883	1e0h-A	48	48	S->A	0.01	9425068	N
P13479	P09883	1e0h-A	69	69	N->A	0.28	9425068	N
P13479	n/a	1e0h-A	47	47	P->A	0.44	9425068	N
P32657	n/a	2dy7-A	220	220	E->L	n/a	15647753	P
P32657	n/a	2dy7-A	220	220	E->W	n/a	17433364	P
P32657	n/a	2dy7-A	222	222	H->Y	n/a	15647753	N
P40343	n/a	1q0v-A	270	270	S->D	n/a	11988742	P
P40343	n/a	1q0v-A	313	313	S->D	n/a	11988742	P
Q16512	D0ZVG2	1urf-A	181	181	R->A	n/a	24248594	P
Q16512	D0ZVG2	1urf-A	185	185	R->A	n/a	24248594	P
P04049	P01112	1rfa-A	67	67	R->A	2	15236966	P
P04049	P01112	1rfa-A	84	84	K->A	2.2	15236966	P
P04049	n/a	1rfa-A	84	84	K->A	2	15236966	P
P04049	P01112	1rfa-A	59	59	R->A	2.04	11292826	P
P04049	P01112	1rfa-A	84	84	K->A	2.04	11292826	P
P04049	P01112	1rfa-A	64	64	N->A	0.1	15236966	N
P04049	P01112	1rfa-A	88	88	V->A	0.1	15236966	N
P04049	n/a	1rfa-A	64	64	N->A	-0.5	15236966	N
P04049	n/a	1rfa-A	65	65	K->A	-0.4	15236966	N
P04049	n/a	1rfa-A	88	88	V->A	0.2	15236966	N
P04049	n/a	1rfa-A	66	66	Q->A	0.1	15236966	N
P04049	n/a	1rfa-A	69	69	V->A	0	15236966	N
P04049	n/a	1rfa-A	71	71	N->R	-0.69	20361980	N
P04049	n/a	1rfa-A	85	85	A->K	-1.1	20361980	N
P32628	P54860	2nbu-A	45	45	I->A	2.88	20427284	P
P32628	P54860	2nbu-A	67	67	Q->A	0.28	20427284	N
P32628	n/a	2nbu-A	10	10	K->A	0.496	20427284	N
Q9NXW2	P11142	2ctp-A	138	36	H->Q	n/a	21150129	P
P63159	Q9QX05	1hme-A	106	18	C->A	n/a	20547845	P
P78423	P49238	1b2t-A	71	47	R->A	n/a	23125415	P
Q9UN37	Q96FZ7	1yxr-A	13	13	V->D	n/a	18606141	P
Q9UN37	Q96FZ7	1yxr-A	64	64	L->A	n/a	18606141	P
Q9WV86	Q8CJ27	2rpa-A	18	18	L->A	n/a	28436967	P
Q9WV86	Q8CJ27	2rpa-A	19	19	L->A	n/a	28436967	P
O75554	Q9Y2W2	2jxw-A	150	29	W->A	n/a	19592703	P
O75554	Q9Y2W2	2jxw-A	191	70	W->A	n/a	19592703	P
P05161	P20701	2hj8-A	99	106	R->A	n/a	29100055	P
P05161	P20701	2hj8-A	101	108	T->A	n/a	29100055	P
P05161	P20701	2hj8-A	103	110	T->A	n/a	29100055	P
P02545	Q0D2I5	1x8y-A	358	358	E->K	n/a	31548606	P
P02545	Q0D2I5	1x8y-A	386	386	R->M	n/a	31548606	P
P0ACE3	P0ACF8	1jw2-A	48	48	D->E	n/a	21600204	P
P0ACE3	P0ACF8	1jw2-A	48	48	D->R	n/a	21600204	P
P0ACE3	P0ACF8	1jw2-A	48	48	D->N	n/a	21600204	P
Q931F4	P01024	2jvg-A	231	231	R->A	n/a	18550524	P
Q931F4	P01024	2jvg-A	238	238	N->A	n/a	18550524	P
P01391	n/a	1ctx-A	49	49	K->E	2.31	10574958	P
P01391	n/a	1ctx-A	27	27	D->R	2.28	10852927	P
P01391	n/a	1ctx-A	29	29	F->A	2.51	10574958	P
P01391	n/a	1ctx-A	33	33	R->E	3.4	10852927	P
P01391	n/a	1ctx-A	11	11	S->A	-0.22	10574958	N
P01391	n/a	1ctx-A	12	12	K->E	0	10574958	N
P01391	n/a	1ctx-A	13	13	D->A	0.05	10574958	N
P01391	n/a	1ctx-A	21	21	Y->F	0.11	10574958	N
P01391	n/a	1ctx-A	25	25	W->F	0.46	10574958	N
P01391	n/a	1ctx-A	32	32	I->A	-0.12	10574958	N
P01391	n/a	1ctx-A	35	35	K->A	0.05	10574958	N
P01391	n/a	1ctx-A	47	47	T->A	0.05	10574958	N
P01391	n/a	1ctx-A	53	53	D->K	-0.2	10574958	N
P01391	n/a	1ctx-A	11	11	S->A	0.27	10852927	N
P01391	n/a	1ctx-A	13	13	D->A	-0.08	10852927	N
P01391	n/a	1ctx-A	21	21	Y->F	0.19	10852927	N
P01391	n/a	1ctx-A	25	25	W->F	0	10852927	N
P01391	n/a	1ctx-A	32	32	I->A	0.4	10852927	N
P01391	n/a	1ctx-A	38	38	D->L	-0.46	10852927	N
P01391	n/a	1ctx-A	47	47	T->A	0.05	10852927	N
P01391	n/a	1ctx-A	53	53	D->K	-0.13	10852927	N
P01391	n/a	1ctx-A	4	4	F->A	0.05	10574958	N
P01391	n/a	1ctx-A	5	5	I->A	-0.28	10574958	N
P01391	n/a	1ctx-A	6	6	T->A	-0.08	10574958	N
P01391	n/a	1ctx-A	7	7	P->A	-0.09	10574958	N
P01391	n/a	1ctx-A	8	8	D->A	-0.09	10574958	N
P01391	n/a	1ctx-A	8	8	D->R	-0.15	10574958	N
P01391	n/a	1ctx-A	9	9	I->A	-0.22	10574958	N
P01391	n/a	1ctx-A	10	10	T->A	-0.22	10574958	N
P01391	n/a	1ctx-A	28	28	A->G	-0.12	10574958	N
P01391	n/a	1ctx-A	28	28	A->R	0	10574958	N
P01391	n/a	1ctx-A	31	31	S->A	0.05	10574958	N
P01391	n/a	1ctx-A	66	66	P->A	0.05	10574958	N
P01391	n/a	1ctx-A	4	4	F->A	0.43	10852927	N
P01391	n/a	1ctx-A	5	5	I->A	0.46	10852927	N
P01391	n/a	1ctx-A	6	6	T->A	0.38	10852927	N
P01391	n/a	1ctx-A	7	7	P->A	0	10852927	N
P01391	n/a	1ctx-A	8	8	D->A	0.17	10852927	N
P01391	n/a	1ctx-A	8	8	D->R	0.19	10852927	N
P01391	n/a	1ctx-A	9	9	I->A	0.41	10852927	N
P01391	n/a	1ctx-A	10	10	T->A	0.05	10852927	N
P01391	n/a	1ctx-A	28	28	A->R	0.05	10852927	N
P01391	n/a	1ctx-A	31	31	S->A	0.34	10852927	N
Q9H1I8	n/a	2di0-A	506	51	L->A	n/a	29144457	P
P01051	P00766	1egl-A	45	45	L->G	6.03	9048543	P
P01051	P00766	1egl-A	45	45	L->S	4.95	9048543	P
P01051	P00766	1egl-A	45	45	L->P	6.85	9048543	P
P01051	P00766	1egl-A	45	45	L->I	4.23	9048543	P
P01051	P00766	1egl-A	45	45	L->D	6.77	9048543	P
P01051	P00766	1egl-A	45	45	L->E	6.55	9048543	P
P53141	P19524	2fce-A	114	114	G->D	n/a	15210731	P
P53141	P19524	2fce-A	135	135	G->E	n/a	15210731	N
P07363	P0AE67	1fwp-A	214	56	F->A	3.44	21642453	P
P07363	P0AE67	1fwp-A	181	23	H->A	0.03	21642453	N
P07363	P0AE67	1fwp-A	202	44	D->A	-0.07	21642453	N
P07363	P0AE67	1fwp-A	207	49	D->A	0.09	21642453	N
P07363	P0AE67	1fwp-A	213	55	C->A	0.19	21642453	N
P07363	n/a	1fwp-A	216	58	I->A	0.4	21642453	N
P10145	P25024	6n2u-A	37	8	I->A	2.1	1918013	P
P10145	P25024	6n2u-A	31	2	E->A	2.84	1918013	P
P10145	P25024	6n2u-A	32	3	L->A	2.84	1918013	P
P10145	P25024	6n2u-A	33	4	R->A	4.25	1918013	P
P10145	P25025	6n2u-A	37	8	I->A	2.1	1918013	P
P10145	P25025	6n2u-A	31	2	E->A	2.84	1918013	P
P10145	P25025	6n2u-A	32	3	L->A	2.84	1918013	P
P10145	P25025	6n2u-A	33	4	R->A	4.25	1918013	P
P36006	Q12446	2btt-A	1158	1159	W->S	n/a	10648568	P
Q9H3P7	Q9UBF8	2n72-A	258	19	F->A	n/a	27009356	P
Q9H3P7	Q9UBF8	2n72-A	284	45	H->A	n/a	27009356	P
Q9H3P7	Q9UBF8	2n72-A	285	46	Y->A	n/a	27009356	P
Q9H3P7	Q9UBF8	2n72-A	288	49	Y->A	n/a	27009356	P
Q9H3P7	Q9UBF8	2n72-A	266	27	Y->A	n/a	27009356	N
O15350	n/a	1cok-A	487	1	Y->A	n/a	15070730	P
O43189	Q6TXQ4	2e5p-A	41	20	W->A	2.47	23142980	P
O43189	Q6TXQ4	2e5p-A	47	26	Y->A	nb	23142980	P
O43189	n/a	2e5p-A	47	26	Y->A	nb	23273982	P
O43189	n/a	2e5p-A	65	44	F->A	nb	23273982	P
O43189	n/a	2e5p-A	71	50	F->A	nb	23273982	P
P30403	n/a	1n4y-A	456	49	R->K	n/a	8456099	P
P30403	n/a	1n4y-A	458	51	D->A	n/a	8456099	P
P30403	n/a	1n4y-A	456	49	R->A	n/a	8456099	P
P02640	n/a	1qqv-A	814	64	W->Y	nb	16142894	P
P02640	n/a	1qqv-A	814	64	W->A	nb	16142894	P
Q5D734	P12643	2mbk-A	48	21	I->R	2.27	18477456	P
Q5D734	P12643	2mbk-A	28	1	L->A	0	18477456	N
Q5D734	P12643	2mbk-A	28	1	L->R	0	18477456	N
Q5D734	P12643	2mbk-A	32	5	T->P	0.46	18477456	N
Q5D734	n/a	2mbk-A	30	3	T->P	0.486	18477456	N
Q5D734	n/a	2mbk-A	45	18	I->A	0.486	18477456	N
P17728	n/a	1lqh-A	27	9	K->D	4.37	9169449	P
P17728	n/a	1lqh-A	27	9	K->A	2.18	9169449	P
P17728	n/a	1lqh-A	29	11	Y->S	2.81	9169449	P
P17728	n/a	1lqh-A	36	18	F->G	2.89	9169449	P
P17728	n/a	1lqh-A	37	19	R->A	3.22	9169449	P
P17728	n/a	1lqh-A	81	63	K->L	3.19	9169449	P
P17728	n/a	1lqh-A	34	16	E->A	-0.3	9169449	N
P17728	n/a	1lqh-A	38	20	D->N	0.12	9169449	N
Q12830	n/a	2fui-A	2882	23	Y->S	2.14	16728978	P
Q12830	n/a	2fui-A	2886	27	D->A	2.14	16728978	P
P03709	P03713	2lsm-A	92	92	H->A	n/a	22801427	P
P03709	P03713	2lsm-A	97	97	H->A	n/a	22801427	N
P03709	P03713	2lsm-A	106	106	F->A	n/a	22801427	N
P23561	P25344	1ow5-A	59	59	I->R	n/a	15327964	P
P23561	P25344	1ow5-A	54	54	Y->R	n/a	15327964	N
P15891	n/a	2k3b-A	569	36	W->A	n/a	11668184	P
P62993	Q07889	1gfc-A	203	47	G->R	n/a	8493579	P
Q16637	P26378	1mhn-A	134	134	E->K	n/a	29061699	P
P00974	P00760	1oa5-5	46	11	T->A	4.05	8784199	P
P00974	P00760	1oa5-5	47	12	G->A	4.35	8784199	P
P00974	P00760	1oa5-5	48	13	P->A	4.05	8784199	P
P00974	P00760	1oa5-5	52	17	R->A	4.05	8784199	P
P00974	P00760	1oa5-5	53	18	I->A	4.97	8784199	P
P00974	P00760	1oa5-5	54	19	I->A	4.05	8784199	P
P00974	P00760	1oa5-5	55	20	R->A	4.05	8784199	P
P00974	P00760	1oa5-5	68	33	F->A	4.05	8784199	P
P00974	P00760	1oa5-5	69	34	V->A	4.05	8784199	P
P00974	P00760	1oa5-5	70	35	Y->A	4.05	8784199	P
P00974	P00760	1oa5-5	71	36	G->A	4.89	8784199	P
P00974	P00760	1oa5-5	72	37	G->A	4.05	8784199	P
P00974	P00760	1oa5-5	74	39	R->A	4.05	8784199	P
P00974	P00760	1oa5-5	81	46	K->A	4.05	8784199	P
P68390	P00766	1omt-A	150	21	R->P	7.19	11171964	P
P68390	P00766	1omt-A	146	17	T->D	6.73	11171964	P
P68390	P00766	1omt-A	146	17	T->E	6.34	11171964	P
P68390	P00766	1omt-A	146	17	T->G	5.22	11171964	P
P68390	P00766	1omt-A	146	17	T->Y	4.41	11171964	P
P68390	P00766	1omt-A	146	17	T->L	4.35	11171964	P
P68390	P00766	1omt-A	146	17	T->N	4.26	11171964	P
P68390	P00766	1omt-A	146	17	T->P	4.17	11171964	P
P68390	P00766	1omt-A	146	17	T->F	4.17	11171964	P
P68390	P00766	1omt-A	146	17	T->A	4.1	11171964	P
P68390	P00766	1omt-A	146	17	T->W	4.1	11171964	P
P68390	P00766	1omt-A	146	17	T->K	4.04	11171964	P
P68390	P00766	1omt-A	146	17	T->M	3.9	11171964	P
P68390	P00766	1omt-A	146	17	T->R	3.83	11171964	P
P68390	P00766	1omt-A	150	21	R->D	3.73	11171964	P
P68390	P00766	1omt-A	146	17	T->Q	3.63	11171964	P
P68390	P00766	1omt-A	148	19	E->R	3.63	11171964	P
P68390	P00766	1omt-A	146	17	T->I	3.6	11171964	P
P68390	P00766	1omt-A	146	17	T->H	3.6	11171964	P
P68390	P00766	1omt-A	148	19	E->G	3.57	11171964	P
P68390	P00766	1omt-A	148	19	E->F	3.57	11171964	P
P68390	P00766	1omt-A	148	19	E->K	3.54	11171964	P
P68390	P00766	1omt-A	146	17	T->V	3.53	11171964	P
P68390	P00766	1omt-A	150	21	R->C	3.47	11171964	P
P68390	P00766	1omt-A	150	21	R->N	3.47	11171964	P
P68390	P00766	1omt-A	150	21	R->E	3.47	11171964	P
P68390	P00766	1omt-A	150	21	R->G	3.44	11171964	P
P68390	P00766	1omt-A	146	17	T->C	3.28	11171964	P
P68390	P00766	1omt-A	150	21	R->A	3.15	11171964	P
P68390	P00766	1omt-A	150	21	R->S	3.14	11171964	P
P68390	P00766	1omt-A	148	19	E->W	3.12	11171964	P
P68390	P00766	1omt-A	150	21	R->Y	2.96	11171964	P
P68390	P00766	1omt-A	150	21	R->F	2.91	11171964	P
P68390	P00766	1omt-A	148	19	E->T	2.87	11171964	P
P68390	P00766	1omt-A	148	19	E->L	2.83	11171964	P
P68390	P00766	1omt-A	150	21	R->L	2.79	11171964	P
P68390	P00766	1omt-A	148	19	E->S	2.76	11171964	P
P68390	P00766	1omt-A	150	21	R->H	2.76	11171964	P
P68390	P00766	1omt-A	148	19	E->C	2.69	11171964	P
P68390	P00766	1omt-A	148	19	E->M	2.66	11171964	P
P68390	P00766	1omt-A	148	19	E->Y	2.63	11171964	P
P68390	P00766	1omt-A	150	21	R->T	2.63	11171964	P
P68390	P00766	1omt-A	148	19	E->I	2.61	11171964	P
P68390	P00766	1omt-A	150	21	R->M	2.58	11171964	P
P68390	P00766	1omt-A	148	19	E->P	2.55	11171964	P
P68390	P00766	1omt-A	150	21	R->Q	2.44	11171964	P
P68390	P00766	1omt-A	148	19	E->V	2.41	11171964	P
P68390	P00766	1omt-A	150	21	R->W	2.41	11171964	P
P68390	P00766	1omt-A	146	17	T->S	2.32	11171964	P
P68390	P00766	1omt-A	148	19	E->A	2.3	11171964	P
P68390	P00766	1omt-A	148	19	E->N	2.3	11171964	P
P68390	P00766	1omt-A	150	21	R->I	2.08	11171964	P
P68390	P00766	1omt-A	148	19	E->H	2.06	11171964	P
P68390	P00766	1omt-A	150	21	R->V	2.04	11171964	P
P68390	n/a	1omt-A	143	14	P->A	0.375	11171964	N
Q06449	Q12446	1zx6-A	91	37	W->S	n/a	21777813	P
P49054	P00747	6okw-A	98	16	K->A	3.62	8748039	P
Q13501	n/a	1q02-A	406	22	F->V	n/a	15340068	P
Q13501	n/a	1q02-A	417	33	L->V	n/a	15340068	P
Q13501	n/a	1q02-A	398	14	L->V	n/a	15340068	N
Q13501	n/a	1q02-A	413	29	L->V	n/a	15340068	N
Q13501	n/a	1q02-A	431	47	I->V	n/a	15340068	N
P01050	P00734	1hic-A	1	1	V->E	4.39	1581311	P
P01050	P00734	1hic-A	1	1	V->K	2.32	1581311	P
P01050	P00734	1hic-A	1	1	V->S	2.16	1581311	P
P01050	P00734	1hic-A	2	2	V->L	2.32	1581311	P
P01050	P00734	1hic-A	2	2	V->G	3.94	1581311	P
P01050	P00734	1hic-A	2	2	V->E	4.28	1581311	P
P01050	P00734	1hic-A	3	3	Y->A	3	1581311	P
P01050	P00734	1hic-A	15	15	L->A	3.55	8135762	P
P01050	P00734	1hic-A	20	20	N->D	-0.13	8135762	N
P01050	n/a	1hic-A	19	19	S->A	-0.08	8135762	N
P01050	n/a	1hic-A	19	19	S->D	0.27	8135762	N
P01050	n/a	1hic-A	49	49	Q->E	0.03	8135762	N
