# Supplementary material for: PPI-hotspotID for detecting protein–protein interaction hot spots from the free protein structure
Source: eLife. 2024 Sep 16;13:RP96643. doi: 10.7554/eLife.96643 (PMC11405013; doi:10.7554/eLife.96643)
Supplement: Source data 2. [file elife-96643-data2.xlsx]

## Sheet: Sheet2
Uniprot code of protein A	Uniprot code of the binding partner, protein B	PDB ID of free protein A structure(length in Uniprot)	PDB ID of bound protein A structure (length in Uniprot)	PDB ID of bound protein B structure	Sequence identity	PPI-hot spots (Uniprot numbering)
O15118	P87666	5f18-A(374-620)	5f1b-C(374-620)	5f1b-A	100	503,504,506
O15118	P87666	5f18-A(374-620)	5jnx-A(1-1278)	5jnx-E	100	503,504,506
O43683	Q8NG31	2lah-A(1-150)	4a1g-A(1-150)	4a1g-E	100	106,122
O43683	Q8NG31	2lah-A(1-150)	4a1g-A(1-150)	4a1g-F	100	106,122
O43683	Q8NG31	2lah-A(1-150)	4a1g-A(1-150)	4a1g-H	100	106,122
O43683	Q8NG31	2lah-A(1-150)	4a1g-B(1-150)	4a1g-F	100	106,122
O43683	Q8NG31	2lah-A(1-150)	4a1g-C(1-150)	4a1g-G	100	106,122
O43683	Q8NG31	2lah-A(1-150)	4a1g-D(1-150)	4a1g-H	100	106,122
O43791	O75367	2cr2-A(28-173)	3ivb-A(28-166)	3ivb-M	100	131
O60493	Q96QK1	2mxc-A(2-162)	5f0j-C(1-162)	5f0j-A	100	22,50
O60493	Q96QK1	2mxc-A(2-162)	5f0l-C(1-162)	5f0l-A	100	22,50
O60493	Q96QK1	2mxc-A(2-162)	5f0m-C(1-162)	5f0m-A	100	22,50
O60493	Q96QK1	2mxc-A(2-162)	5f0p-C(1-162)	5f0p-A	100	22,50
O75475	P12497	1z9e-A(346-471)	2b4j-C(346-442)	2b4j-A	97	365,366,406
O75475	P12497	1z9e-A(346-471)	2b4j-C(346-442)	2b4j-B	97	365,366,406
O75475	P12497	1z9e-A(346-471)	2b4j-D(346-442)	2b4j-A	97	365,366,406
O75475	P12497	1z9e-A(346-471)	2b4j-D(346-442)	2b4j-B	97	365,366,406
O94888	P55072	1wj4-A(377-487)	5x4l-C(410-489)	5x4l-A	90	459
O94888	P55072	1wj4-A(377-487)	5x4l-C(410-489)	5x4l-B	90	459
O94888	P55072	1wj4-A(377-487)	5x4l-D(410-489)	5x4l-B	90	459
O95760	Q01638	2kll-A(111-270)	4kc3-A(112-270)	4kc3-B	97	149
O95786	Q7Z434	2lwd-A(95-190)	4p4h-A(1-201)	4p4h-I	97	172
O95786	Q7Z434	2lwd-A(95-190)	4p4h-B(1-201)	4p4h-I	98	172
O95786	Q7Z434	2lwd-A(95-190)	4p4h-B(1-201)	4p4h-J	98	172
O95786	Q7Z434	2lwd-A(95-190)	4p4h-C(1-201)	4p4h-I	98	172
O95786	Q7Z434	2lwd-A(95-190)	4p4h-C(1-201)	4p4h-J	98	172
O95786	Q7Z434	2lwd-A(95-190)	4p4h-C(1-201)	4p4h-K	98	172
O95786	Q7Z434	2lwd-A(95-190)	4p4h-D(1-201)	4p4h-I	97	172
O95786	Q7Z434	2lwd-A(95-190)	4p4h-D(1-201)	4p4h-K	97	172
O95786	Q7Z434	2lwd-A(95-190)	4p4h-D(1-201)	4p4h-L	97	172
O95786	Q7Z434	2lwd-A(95-190)	4p4h-E(1-201)	4p4h-M	97	172
O95786	Q7Z434	2lwd-A(95-190)	4p4h-F(1-201)	4p4h-M	98	172
O95786	Q7Z434	2lwd-A(95-190)	4p4h-F(1-201)	4p4h-N	98	172
O95786	Q7Z434	2lwd-A(95-190)	4p4h-G(1-201)	4p4h-M	98	172
O95786	Q7Z434	2lwd-A(95-190)	4p4h-G(1-201)	4p4h-N	98	172
O95786	Q7Z434	2lwd-A(95-190)	4p4h-G(1-201)	4p4h-O	98	172
O95786	Q7Z434	2lwd-A(95-190)	4p4h-H(1-201)	4p4h-M	97	172
O95786	Q7Z434	2lwd-A(95-190)	4p4h-H(1-201)	4p4h-O	97	172
O95786	Q7Z434	2lwd-A(95-190)	4p4h-H(1-201)	4p4h-P	97	172
P00648	P11540	1bnr-A(48-157)	1b27-A(48-157)	1b27-D	100	74,105,106,120,130,134,149
P00648	P11540	1bnr-A(48-157)	1b27-B(48-157)	1b27-E	100	74,105,106,120,130,134,149
P00648	P11540	1bnr-A(48-157)	1b27-C(48-157)	1b27-F	100	74,105,106,120,130,134,149
P00648	P11540	1bnr-A(48-157)	1b2s-A(48-157)	1b2s-D	99	74,105,106,120,130,134,149
P00648	P11540	1bnr-A(48-157)	1b2s-B(48-157)	1b2s-E	99	74,105,106,120,130,134,149
P00648	P11540	1bnr-A(48-157)	1b2s-C(48-157)	1b2s-F	99	74,105,106,120,130,134,149
P00648	P11540	1bnr-A(48-157)	1b2u-A(48-157)	1b2u-D	99	74,105,106,120,130,134,149
P00648	P11540	1bnr-A(48-157)	1b2u-B(48-157)	1b2u-E	99	74,105,106,120,130,134,149
P00648	P11540	1bnr-A(48-157)	1b2u-C(48-157)	1b2u-F	99	74,105,106,120,130,134,149
P00648	P11540	1bnr-A(48-157)	1b3s-A(48-157)	1b3s-D	99	74,105,106,120,130,134,149
P00648	P11540	1bnr-A(48-157)	1b3s-B(48-157)	1b3s-E	99	74,105,106,120,130,134,149
P00648	P11540	1bnr-A(48-157)	1b3s-C(48-157)	1b3s-F	99	74,105,106,120,130,134,149
P00648	P11540	1bnr-A(48-157)	1bgs-A(48-157)	1bgs-E	100	74,105,106,120,130,134,149
P00648	P11540	1bnr-A(48-157)	1bgs-B(48-157)	1bgs-F	100	74,105,106,120,130,134,149
P00648	P11540	1bnr-A(48-157)	1bgs-C(48-157)	1bgs-G	100	74,105,106,120,130,134,149
P00648	P11540	1bnr-A(48-157)	1brs-A(48-157)	1brs-D	100	74,105,106,120,130,134,149
P00648	P11540	1bnr-A(48-157)	1brs-B(48-157)	1brs-E	100	74,105,106,120,130,134,149
P00648	P11540	1bnr-A(48-157)	1brs-C(48-157)	1brs-F	100	74,105,106,120,130,134,149
P00648	P11540	1bnr-A(48-157)	1x1u-A(48-157)	1x1u-D	100	74,105,106,120,130,134,149
P00648	P11540	1bnr-A(48-157)	1x1u-B(48-157)	1x1u-E	100	74,105,106,120,130,134,149
P00648	P11540	1bnr-A(48-157)	1x1u-C(48-157)	1x1u-F	100	74,105,106,120,130,134,149
P00648	P11540	1bnr-A(48-157)	1x1w-A(48-157)	1x1w-D	100	74,105,106,120,130,134,149
P00648	P11540	1bnr-A(48-157)	1x1w-B(48-157)	1x1w-E	100	74,105,106,120,130,134,149
P00648	P11540	1bnr-A(48-157)	1x1w-C(48-157)	1x1w-F	100	74,105,106,120,130,134,149
P00648	P11540	1bnr-A(48-157)	1x1x-A(48-157)	1x1x-D	100	74,105,106,120,130,134,149
P00648	P11540	1bnr-A(48-157)	1x1x-B(48-157)	1x1x-E	100	74,105,106,120,130,134,149
P00648	P11540	1bnr-A(48-157)	1x1x-C(48-157)	1x1x-F	100	74,105,106,120,130,134,149
P00648	P11540	1bnr-A(48-157)	1x1y-A(48-157)	1x1y-D	100	74,105,106,120,130,134,149
P00648	P11540	1bnr-A(48-157)	1x1y-B(48-157)	1x1y-E	99	74,105,106,120,130,134,149
P00648	P11540	1bnr-A(48-157)	1x1y-C(48-157)	1x1y-F	100	74,105,106,120,130,134,149
P00648	P11540	1bnr-A(48-157)	2za4-A(48-157)	2za4-B	99	74,105,106,120,130,134,149
P00648	P11540	1bnr-A(48-157)	2za4-C(48-157)	2za4-D	99	74,105,106,120,130,134,149
P00648	P11540	1bnr-A(48-157)	3da7-A(43-113)	3da7-D	60	74,105,106,120,130,134,149
P00648	P11540	1bnr-A(48-157)	3da7-B(43-113)	3da7-C	57	74,105,106,120,130,134,149
P00648	P11540	1bnr-A(48-157)	3da7-E(43-113)	3da7-F	58	74,105,106,120,130,134,149
P00648	P11540	1bnr-A(48-157)	3da7-G(43-113)	3da7-H	56	74,105,106,120,130,134,149
P00648	P11540	1bnr-A(48-157)	6pqk-A(48-157)	6pqk-B	98	74,105,106,120,130,134,149
P00648	P11540	1bnr-A(48-157)	6pqk-A(48-157)	6pqk-D	98	74,105,106,120,130,134,149
P00648	P11540	1bnr-A(48-157)	6pqk-C(48-157)	6pqk-B	98	74,105,106,120,130,134,149
P00974	P00760	1oa5-5(36-93)	1ejm-B(36-93)	1ejm-A	94	46,47,48,52,53,54,55,68,69,70,71,72,74,81
P00974	P00760	1oa5-5(36-93)	1ejm-B(36-93)	1ejm-E	94	46,47,48,52,53,54,55,68,69,70,71,72,74,81
P00974	P00760	1oa5-5(36-93)	1ejm-D(36-93)	1ejm-C	94	46,47,48,52,53,54,55,68,69,70,71,72,74,81
P00974	P00760	1oa5-5(36-93)	1ejm-F(36-93)	1ejm-A	94	46,47,48,52,53,54,55,68,69,70,71,72,74,81
P00974	P00760	1oa5-5(36-93)	1ejm-F(36-93)	1ejm-C	94	46,47,48,52,53,54,55,68,69,70,71,72,74,81
P00974	P00760	1oa5-5(36-93)	1ejm-F(36-93)	1ejm-E	94	46,47,48,52,53,54,55,68,69,70,71,72,74,81
P00974	P00760	1oa5-5(36-93)	1p2i-I(36-93)	1p2i-A	96	46,47,48,52,53,54,55,68,69,70,71,72,74,81
P00974	P00760	1oa5-5(36-93)	1p2j-I(36-93)	1p2j-A	96	46,47,48,52,53,54,55,68,69,70,71,72,74,81
P00974	P00760	1oa5-5(36-93)	1p2k-I(36-93)	1p2k-A	96	46,47,48,52,53,54,55,68,69,70,71,72,74,81
P00974	P00760	1oa5-5(36-93)	1tpa-I(36-93)	1tpa-E	100	46,47,48,52,53,54,55,68,69,70,71,72,74,81
P00974	P00760	1oa5-5(36-93)	2fi3-I(36-93)	2fi3-E	96	46,47,48,52,53,54,55,68,69,70,71,72,74,81
P00974	P00760	1oa5-5(36-93)	2fi4-I(36-93)	2fi4-E	98	46,47,48,52,53,54,55,68,69,70,71,72,74,81
P00974	P00760	1oa5-5(36-93)	2fi5-I(36-93)	2fi5-E	98	46,47,48,52,53,54,55,68,69,70,71,72,74,81
P00974	P00760	1oa5-5(36-93)	2ftl-I(36-93)	2ftl-E	100	46,47,48,52,53,54,55,68,69,70,71,72,74,81
P00974	P00760	1oa5-5(36-93)	2ftm-B(36-93)	2ftm-A	98	46,47,48,52,53,54,55,68,69,70,71,72,74,81
P00974	P00760	1oa5-5(36-93)	2ptc-I(36-93)	2ptc-E	100	46,47,48,52,53,54,55,68,69,70,71,72,74,81
P00974	P00760	1oa5-5(36-93)	2tgp-I(36-93)	2tgp-Z	100	46,47,48,52,53,54,55,68,69,70,71,72,74,81
P00974	P00760	1oa5-5(36-93)	2tpi-I(36-93)	2tpi-Z	100	46,47,48,52,53,54,55,68,69,70,71,72,74,81
P00974	P00760	1oa5-5(36-93)	3btd-I(36-93)	3btd-E	96	46,47,48,52,53,54,55,68,69,70,71,72,74,81
P00974	P00760	1oa5-5(36-93)	3bte-I(36-93)	3bte-E	96	46,47,48,52,53,54,55,68,69,70,71,72,74,81
P00974	P00760	1oa5-5(36-93)	3btf-I(36-93)	3btf-E	96	46,47,48,52,53,54,55,68,69,70,71,72,74,81
P00974	P00760	1oa5-5(36-93)	3btg-I(36-93)	3btg-E	96	46,47,48,52,53,54,55,68,69,70,71,72,74,81
P00974	P00760	1oa5-5(36-93)	3bth-I(36-93)	3bth-E	96	46,47,48,52,53,54,55,68,69,70,71,72,74,81
P00974	P00760	1oa5-5(36-93)	3btk-I(36-93)	3btk-E	100	46,47,48,52,53,54,55,68,69,70,71,72,74,81
P00974	P00760	1oa5-5(36-93)	3btm-I(36-93)	3btm-E	96	46,47,48,52,53,54,55,68,69,70,71,72,74,81
P00974	P00760	1oa5-5(36-93)	3btq-I(36-93)	3btq-E	96	46,47,48,52,53,54,55,68,69,70,71,72,74,81
P00974	P00760	1oa5-5(36-93)	3btt-I(36-93)	3btt-E	96	46,47,48,52,53,54,55,68,69,70,71,72,74,81
P00974	P00760	1oa5-5(36-93)	3btw-I(36-93)	3btw-E	96	46,47,48,52,53,54,55,68,69,70,71,72,74,81
P00974	P00760	1oa5-5(36-93)	3otj-I(36-93)	3otj-E	100	46,47,48,52,53,54,55,68,69,70,71,72,74,81
P00974	P00760	1oa5-5(36-93)	3tpi-I(36-93)	3tpi-Z	100	46,47,48,52,53,54,55,68,69,70,71,72,74,81
P00974	P00760	1oa5-5(36-93)	4tpi-I(36-93)	4tpi-Z	98	46,47,48,52,53,54,55,68,69,70,71,72,74,81
P00974	P00760	1oa5-5(36-93)	4y0y-I(36-93)	4y0y-E	100	46,47,48,52,53,54,55,68,69,70,71,72,74,81
P00974	P00760	1oa5-5(36-93)	4y0z-I(36-93)	4y0z-E	100	46,47,48,52,53,54,55,68,69,70,71,72,74,81
P00974	P00760	1oa5-5(36-93)	4y10-I(36-93)	4y10-E	100	46,47,48,52,53,54,55,68,69,70,71,72,74,81
P00974	P00760	1oa5-5(36-93)	4y11-I(36-93)	4y11-E	100	46,47,48,52,53,54,55,68,69,70,71,72,74,81
P00974	P00760	1oa5-5(36-93)	7ph1-I(36-93)	7ph1-E	100	46,47,48,52,53,54,55,68,69,70,71,72,74,81
P01033	P03956	1d2b-A(24-149)	2j0t-D(24-149)	2j0t-A	100	25,91
P01033	P03956	1d2b-A(24-149)	2j0t-E(24-149)	2j0t-B	100	25,91
P01033	P03956	1d2b-A(24-149)	2j0t-F(24-149)	2j0t-C	100	25,91
P01033	P08254	1d2b-A(24-149)	1oo9-B(24-149)	1oo9-A	100	25,61,91,93
P01033	P08254	1d2b-A(24-149)	1uea-B(24-207)	1uea-A	98	25,61,91,93
P01033	P08254	1d2b-A(24-149)	1uea-D(24-207)	1uea-C	98	25,61,91,93
P01033	P08254	1d2b-A(24-149)	6mav-B(24-207)	6mav-A	95	25,61,91,93
P01033	P08254	1d2b-A(24-149)	6n9d-B(24-207)	6n9d-A	96	25,61,91,93
P01033	P08254	1d2b-A(24-149)	7s7l-B(24-149)	7s7l-A	93	25,61,91,93
P01033	P08254	1d2b-A(24-149)	7s7m-B(24-149)	7s7m-A	92	25,61,91,93
P01050	P00734	1hic-A(1-51)	2pw8-I(3-65)	2pw8-H	94	1,2,3,15
P01050	P00734	1hic-A(1-51)	4mlf-D(1-65)	4mlf-B	92	1,2,3,15
P01051	P00766	1egl-A(1-70)	1acb-I(1-70)	1acb-E	100	45
P01236	P16471	1rw5-A(29-227)	3d48-P(40-227)	3d48-R	99	208
P01236	P16471	1rw5-A(29-227)	3mzg-A(43-227)	3mzg-B	98	208
P01236	P16471	1rw5-A(29-227)	3n06-A(43-227)	3n06-B	98	208
P01236	P16471	1rw5-A(29-227)	3n0p-A(43-227)	3n0p-B	98	208
P01236	P16471	1rw5-A(29-227)	3ncb-A(43-227)	3ncb-B	98	208
P01236	P16471	1rw5-A(29-227)	3ncc-A(43-227)	3ncc-B	98	208
P01236	P16471	1rw5-A(29-227)	3nce-A(43-227)	3nce-B	98	208
P01236	P16471	1rw5-A(29-227)	3ncf-A(43-227)	3ncf-B	98	208
P01563	P48551	1itf-A(24-188)	2hym-B(24-188)	2hym-A	100	38,53,56,167,168,171,172
P01563	P48551	1itf-A(24-188)	2kz1-A(24-188)	2kz1-B	100	38,53,56,167,168,171,172
P01563	P48551	1itf-A(24-188)	2lag-A(24-188)	2lag-B	100	38,53,56,167,168,171,172
P01563	P48551	1itf-A(24-188)	3s9d-A(24-188)	3s9d-B	96	38,53,56,167,168,171,172
P01563	P48551	1itf-A(24-188)	3s9d-C(24-188)	3s9d-D	96	38,53,56,167,168,171,172
P01563	P48551	1itf-A(24-188)	3se3-B(24-188)	3se3-C	96	38,53,56,167,168,171,172
P02829	P28707	1ah6-A(1-220)	2cg9-A(1-677)	2cg9-X	100	97,170
P02829	P28707	1ah6-A(1-220)	2cg9-A(1-677)	2cg9-Y	100	97,170
P02829	P28707	1ah6-A(1-220)	2cg9-B(1-677)	2cg9-X	100	97,170
P02829	P28707	1ah6-A(1-220)	2cg9-B(1-677)	2cg9-Y	100	97,170
P03950	P13489	5eop-A(26-146)	1a4y-B(25-147)	1a4y-A	100	29,64
P03950	P13489	5eop-A(26-146)	1a4y-E(25-147)	1a4y-D	100	29,64
P04049	P01112	1rfa-A(54-132)	3kud-B(51-131)	3kud-A	98	59,67,84
P04049	P01112	1rfa-A(54-132)	4g0n-B(54-131)	4g0n-A	98	59,67,84
P04049	P01112	1rfa-A(54-132)	4g3x-B(55-131)	4g3x-A	100	59,67,84
P04049	P01112	1rfa-A(54-132)	6ntc-B(55-131)	6ntc-A	84	59,67,84
P04049	P01112	1rfa-A(54-132)	6ntd-B(55-131)	6ntd-A	85	59,67,84
P04049	P01112	1rfa-A(54-132)	7jhp-C(55-187)	7jhp-A	93	59,67,84
P05112	P24394	1bbn-A(22-153)	1iar-A(25-153)	1iar-B	98	33,112,113,147,148
P05112	P24394	1bbn-A(22-153)	3bpl-A(25-153)	3bpl-B	98	33,112,113,147,148
P05112	P24394	1bbn-A(22-153)	3bpn-A(25-153)	3bpn-B	98	33,112,113,147,148
P05112	P24394	1bbn-A(22-153)	6oel-A(25-153)	6oel-B	92	33,112,113,147,148
P06729	P19256	1cdb-A(25-129)	1qa9-A(28-129)	1qa9-B	97	67,70,110,111
P06729	P19256	1cdb-A(25-129)	1qa9-C(28-129)	1qa9-D	97	67,70,110,111
P06730	Q13541	2gpq-A(1-217)	1wkw-A(27-217)	1wkw-B	100	73
P06730	Q13541	2gpq-A(1-217)	2v8w-A(1-217)	2v8w-B	100	73
P06730	Q13541	2gpq-A(1-217)	2v8w-A(1-217)	2v8w-F	100	73
P06730	Q13541	2gpq-A(1-217)	2v8w-E(1-217)	2v8w-F	100	73
P06730	Q13541	2gpq-A(1-217)	2v8x-A(1-217)	2v8x-B	100	73
P06730	Q13541	2gpq-A(1-217)	2v8x-A(1-217)	2v8x-F	100	73
P06730	Q13541	2gpq-A(1-217)	2v8x-E(1-217)	2v8x-F	100	73
P06730	Q13541	2gpq-A(1-217)	2v8y-A(1-217)	2v8y-B	100	73
P06730	Q13541	2gpq-A(1-217)	2v8y-A(1-217)	2v8y-F	100	73
P06730	Q13541	2gpq-A(1-217)	2v8y-E(1-217)	2v8y-F	100	73
P06730	Q13541	2gpq-A(1-217)	3u7x-A(1-217)	3u7x-C	100	73
P06730	Q13541	2gpq-A(1-217)	3u7x-B(1-217)	3u7x-D	100	73
P06730	Q13541	2gpq-A(1-217)	4ued-A(36-217)	4ued-B	94	73
P06730	Q13541	2gpq-A(1-217)	5ekv-A(1-217)	5ekv-B	100	73
P06730	Q13541	2gpq-A(1-217)	5ekv-A(1-217)	5ekv-D	100	73
P06730	Q13541	2gpq-A(1-217)	5ekv-C(1-217)	5ekv-D	97	73
P07363	P0AE67	1fwp-A(124-262)	1a0o-B(124-257)	1a0o-A	100	214
P07363	P0AE67	1fwp-A(124-262)	1a0o-D(124-257)	1a0o-C	100	214
P07363	P0AE67	1fwp-A(124-262)	1a0o-F(124-257)	1a0o-E	100	214
P07363	P0AE67	1fwp-A(124-262)	1a0o-H(124-257)	1a0o-G	100	214
P07363	P0AE67	1fwp-A(124-262)	1eay-C(156-228)	1eay-A	100	214
P07363	P0AE67	1fwp-A(124-262)	1eay-D(156-228)	1eay-B	98	214
P07363	P0AE67	1fwp-A(124-262)	1ffg-B(124-257)	1ffg-A	100	214
P07363	P0AE67	1fwp-A(124-262)	1ffg-D(124-257)	1ffg-C	100	214
P07363	P0AE67	1fwp-A(124-262)	1ffs-B(124-257)	1ffs-A	98	214
P07363	P0AE67	1fwp-A(124-262)	1ffs-D(124-257)	1ffs-C	98	214
P07363	P0AE67	1fwp-A(124-262)	1ffw-B(124-257)	1ffw-A	98	214
P07363	P0AE67	1fwp-A(124-262)	1ffw-D(124-257)	1ffw-C	98	214
P07363	P0AE67	1fwp-A(124-262)	2lp4-A(1-225)	2lp4-Y	97	214
P08887	P05231	2arw-A(212-336)	1p9m-C(115-315)	1p9m-B	99	217,279,291,293
P08887	P05231	2arw-A(212-336)	5fuc-C(111-322)	5fuc-A	98	217,279,291,293
P08887	P05231	2arw-A(212-336)	5fuc-C(111-322)	5fuc-B	98	217,279,291,293
P08887	P05231	2arw-A(212-336)	5fuc-D(111-322)	5fuc-A	98	217,279,291,293
P08887	P05231	2arw-A(212-336)	5fuc-D(111-322)	5fuc-B	98	217,279,291,293
P09038	P11362	1bfg-A(143-288)	1cvs-A(157-288)	1cvs-C	100	166,238,245,282
P09038	P11362	1bfg-A(143-288)	1cvs-A(157-288)	1cvs-D	100	166,238,245,282
P09038	P11362	1bfg-A(143-288)	1cvs-B(157-288)	1cvs-C	100	166,238,245,282
P09038	P11362	1bfg-A(143-288)	1cvs-B(157-288)	1cvs-D	100	166,238,245,282
P09038	P11362	1bfg-A(143-288)	1fq9-A(157-288)	1fq9-C	100	166,238,245,282
P09038	P11362	1bfg-A(143-288)	1fq9-A(157-288)	1fq9-D	100	166,238,245,282
P09038	P11362	1bfg-A(143-288)	1fq9-B(157-288)	1fq9-C	100	166,238,245,282
P09038	P11362	1bfg-A(143-288)	1fq9-B(157-288)	1fq9-D	100	166,238,245,282
P0ACE3	P0ACF8	1jw2-A(1-72)	2mw2-A(1-72)	2mw2-B	100	48
P0ACE3	P0ACF8	1jw2-A(1-72)	2mw2-A(1-72)	2mw2-C	100	48
P0CG48	P15374	2k25-A(606-683)	1xd3-B(609-683)	1xd3-A	98	616,682
P0CG48	P15374	2k25-A(606-683)	1xd3-B(609-683)	1xd3-C	98	616,682
P0CG48	P15374	2k25-A(606-683)	1xd3-D(609-683)	1xd3-A	98	616,682
P0CG48	P15374	2k25-A(606-683)	1xd3-D(609-683)	1xd3-C	98	616,682
P0CG48	P15374	2k25-A(606-683)	6qml-C(609-684)	6qml-A	97	616,682
P0CG48	P15374	2k25-A(606-683)	6qml-F(609-684)	6qml-D	97	616,682
P10145	P25024	6n2u-A(1-99)	1ilp-A(28-99)	1ilp-C	100	31,32,33,37
P10145	P25024	6n2u-A(1-99)	1ilq-A(28-99)	1ilq-C	100	31,32,33,37
P10145	P25024	6n2u-A(1-99)	6xmn-A(28-93)	6xmn-B	96	31,32,33,37
P10145	P25025	6n2u-A(1-99)	6lfm-D(28-99)	6lfm-R	100	31,32,33,37
P10145	P25025	6n2u-A(1-99)	6lfm-E(28-99)	6lfm-R	98	31,32,33,37
P10145	P25025	6n2u-A(1-99)	6lfo-D(28-92)	6lfo-R	98	31,32,33,37
P10600	P37173	1tgk-A(301-412)	1ktz-A(301-412)	1ktz-B	100	394
P10600	P37173	1tgk-A(301-412)	2pjy-A(301-412)	2pjy-B	100	394
P11540	P00648	1bta-A(2-90)	1b27-D(1-90)	1b27-A	97	30,36,40
P11540	P00648	1bta-A(2-90)	1b27-E(1-90)	1b27-B	97	30,36,40
P11540	P00648	1bta-A(2-90)	1b27-F(1-90)	1b27-C	97	30,36,40
P11540	P00648	1bta-A(2-90)	1b2s-D(1-90)	1b2s-A	98	30,36,40
P11540	P00648	1bta-A(2-90)	1b2s-E(1-90)	1b2s-B	98	30,36,40
P11540	P00648	1bta-A(2-90)	1b2s-F(1-90)	1b2s-C	98	30,36,40
P11540	P00648	1bta-A(2-90)	1b2u-D(1-90)	1b2u-A	98	30,36,40
P11540	P00648	1bta-A(2-90)	1b2u-E(1-90)	1b2u-B	98	30,36,40
P11540	P00648	1bta-A(2-90)	1b2u-F(1-90)	1b2u-C	98	30,36,40
P11540	P00648	1bta-A(2-90)	1b3s-D(1-90)	1b3s-A	98	30,36,40
P11540	P00648	1bta-A(2-90)	1b3s-E(1-90)	1b3s-B	98	30,36,40
P11540	P00648	1bta-A(2-90)	1b3s-F(1-90)	1b3s-C	98	30,36,40
P11540	P00648	1bta-A(2-90)	1bgs-E(2-90)	1bgs-A	97	30,36,40
P11540	P00648	1bta-A(2-90)	1bgs-F(2-90)	1bgs-B	97	30,36,40
P11540	P00648	1bta-A(2-90)	1bgs-G(2-90)	1bgs-C	97	30,36,40
P11540	P00648	1bta-A(2-90)	1brs-D(2-90)	1brs-A	97	30,36,40
P11540	P00648	1bta-A(2-90)	1brs-E(2-90)	1brs-B	97	30,36,40
P11540	P00648	1bta-A(2-90)	1brs-F(2-90)	1brs-C	97	30,36,40
P11540	P00648	1bta-A(2-90)	1x1u-D(2-90)	1x1u-A	97	30,36,40
P11540	P00648	1bta-A(2-90)	1x1u-E(2-90)	1x1u-B	97	30,36,40
P11540	P00648	1bta-A(2-90)	1x1u-F(2-90)	1x1u-C	97	30,36,40
P11540	P00648	1bta-A(2-90)	1x1w-D(1-90)	1x1w-A	96	30,36,40
P11540	P00648	1bta-A(2-90)	1x1w-E(1-90)	1x1w-B	96	30,36,40
P11540	P00648	1bta-A(2-90)	1x1w-F(1-90)	1x1w-C	96	30,36,40
P11540	P00648	1bta-A(2-90)	1x1x-D(2-90)	1x1x-A	96	30,36,40
P11540	P00648	1bta-A(2-90)	1x1x-E(2-90)	1x1x-B	96	30,36,40
P11540	P00648	1bta-A(2-90)	1x1x-F(2-90)	1x1x-C	96	30,36,40
P11540	P00648	1bta-A(2-90)	1x1y-D(1-90)	1x1y-A	96	30,36,40
P11540	P00648	1bta-A(2-90)	1x1y-E(1-90)	1x1y-B	96	30,36,40
P11540	P00648	1bta-A(2-90)	1x1y-F(1-90)	1x1y-C	96	30,36,40
P11540	P00648	1bta-A(2-90)	2za4-B(1-90)	2za4-A	95	30,36,40
P11540	P00648	1bta-A(2-90)	2za4-D(1-90)	2za4-C	92	30,36,40
P11540	P00648	1bta-A(2-90)	3da7-C(1-90)	3da7-B	100	30,36,40
P11540	P00648	1bta-A(2-90)	3da7-D(1-90)	3da7-A	100	30,36,40
P11540	P00648	1bta-A(2-90)	3da7-F(1-90)	3da7-E	100	30,36,40
P11540	P00648	1bta-A(2-90)	3da7-H(1-90)	3da7-G	100	30,36,40
P11540	P00648	1bta-A(2-90)	6pqk-B(1-90)	6pqk-A	95	30,36,40
P11540	P00648	1bta-A(2-90)	6pqk-B(1-90)	6pqk-C	95	30,36,40
P11540	P00648	1bta-A(2-90)	6pqk-D(1-90)	6pqk-A	95	30,36,40
P12493	P49790	6wap-A(133-363)	5tsx-A(133-363)	5tsx-M	98	189,305
P12493	P49790	6wap-A(133-363)	5tsx-B(133-363)	5tsx-N	98	189,305
P12493	P49790	6wap-A(133-363)	5tsx-C(133-363)	5tsx-N	98	189,305
P12493	P49790	6wap-A(133-363)	5tsx-D(133-363)	5tsx-M	98	189,305
P12493	P49790	6wap-A(133-363)	5tsx-J(133-363)	5tsx-O	99	189,305
P12493	P49790	6wap-A(133-363)	5tsx-L(133-363)	5tsx-O	98	189,305
P13479	P09883	1e0h-A(1-86)	1bxi-A(1-86)	1bxi-B	97	33,34,41,50,51,54,55
P13479	P09883	1e0h-A(1-86)	1emv-A(1-86)	1emv-B	100	33,34,41,50,51,54,55
P13479	P09883	1e0h-A(1-86)	1fr2-A(1-86)	1fr2-B	98	33,34,41,50,51,54,55
P13479	P09883	1e0h-A(1-86)	2gyk-A(1-86)	2gyk-B	98	33,34,41,50,51,54,55
P13479	P09883	1e0h-A(1-86)	2gyk-E(1-86)	2gyk-F	98	33,34,41,50,51,54,55
P13479	P09883	1e0h-A(1-86)	2gze-A(1-86)	2gze-B	98	33,34,41,50,51,54,55
P13479	P09883	1e0h-A(1-86)	2gzf-A(1-86)	2gzf-B	98	33,34,41,50,51,54,55
P13479	P09883	1e0h-A(1-86)	2gzg-A(1-86)	2gzg-B	98	33,34,41,50,51,54,55
P13479	P09883	1e0h-A(1-86)	2gzi-A(1-86)	2gzi-B	98	33,34,41,50,51,54,55
P13479	P09883	1e0h-A(1-86)	2gzj-A(1-86)	2gzj-B	98	33,34,41,50,51,54,55
P13479	P09883	1e0h-A(1-86)	2gzj-E(1-86)	2gzj-F	98	33,34,41,50,51,54,55
P13479	P09883	1e0h-A(1-86)	2k5x-A(1-86)	2k5x-B	100	33,34,41,50,51,54,55
P13479	P09883	1e0h-A(1-86)	2vln-A(1-86)	2vln-B	100	33,34,41,50,51,54,55
P13479	P09883	1e0h-A(1-86)	2vlo-A(1-86)	2vlo-B	96	33,34,41,50,51,54,55
P13479	P09883	1e0h-A(1-86)	2vlp-A(1-86)	2vlp-B	100	33,34,41,50,51,54,55
P13479	P09883	1e0h-A(1-86)	2vlq-A(1-86)	2vlq-B	100	33,34,41,50,51,54,55
P13479	P09883	1e0h-A(1-86)	5ew5-E(1-86)	5ew5-A	100	33,34,41,50,51,54,55
P13479	P09883	1e0h-A(1-86)	5ew5-F(1-86)	5ew5-B	100	33,34,41,50,51,54,55
P13479	P09883	1e0h-A(1-86)	5ew5-G(1-86)	5ew5-B	100	33,34,41,50,51,54,55
P13479	P09883	1e0h-A(1-86)	5ew5-G(1-86)	5ew5-D	100	33,34,41,50,51,54,55
P13479	P09883	1e0h-A(1-86)	5ew5-H(1-86)	5ew5-A	100	33,34,41,50,51,54,55
P13479	P09883	1e0h-A(1-86)	5ew5-H(1-86)	5ew5-C	100	33,34,41,50,51,54,55
P13726	P08709	1boy-A(33-251)	1dan-T(37-116)	1dan-H	100	52,76,77,90,92,172
P13726	P08709	1boy-A(33-251)	1dan-T(37-116)	1dan-L	100	52,76,77,90,92,172
P13726	P08709	1boy-A(33-251)	1dan-U(122-242)	1dan-H	100	52,76,77,90,92,172
P13726	P08709	1boy-A(33-251)	1dan-U(122-242)	1dan-L	100	52,76,77,90,92,172
P13726	P08709	1boy-A(33-251)	1fak-T(37-242)	1fak-H	100	52,76,77,90,92,172
P13726	P08709	1boy-A(33-251)	1fak-T(37-242)	1fak-L	100	52,76,77,90,92,172
P13726	P08709	1boy-A(33-251)	1j9c-T(33-242)	1j9c-H	99	52,76,77,90,92,172
P13726	P08709	1boy-A(33-251)	1j9c-T(33-242)	1j9c-L	99	52,76,77,90,92,172
P13726	P08709	1boy-A(33-251)	1o5d-T(34-251)	1o5d-H	100	52,76,77,90,92,172
P13726	P08709	1boy-A(33-251)	1o5d-T(34-251)	1o5d-L	100	52,76,77,90,92,172
P13726	P08709	1boy-A(33-251)	1w0y-T(33-242)	1w0y-H	100	52,76,77,90,92,172
P13726	P08709	1boy-A(33-251)	1w0y-T(33-242)	1w0y-L	100	52,76,77,90,92,172
P13726	P08709	1boy-A(33-251)	1w2k-T(33-242)	1w2k-H	100	52,76,77,90,92,172
P13726	P08709	1boy-A(33-251)	1w2k-T(33-242)	1w2k-L	100	52,76,77,90,92,172
P13726	P08709	1boy-A(33-251)	1wqv-T(33-250)	1wqv-H	100	52,76,77,90,92,172
P13726	P08709	1boy-A(33-251)	1wqv-T(33-250)	1wqv-L	100	52,76,77,90,92,172
P13726	P08709	1boy-A(33-251)	1wss-T(33-250)	1wss-H	100	52,76,77,90,92,172
P13726	P08709	1boy-A(33-251)	1wss-T(33-250)	1wss-L	100	52,76,77,90,92,172
P13726	P08709	1boy-A(33-251)	1wtg-T(33-250)	1wtg-H	100	52,76,77,90,92,172
P13726	P08709	1boy-A(33-251)	1wtg-T(33-250)	1wtg-L	100	52,76,77,90,92,172
P13726	P08709	1boy-A(33-251)	1wun-T(33-250)	1wun-H	100	52,76,77,90,92,172
P13726	P08709	1boy-A(33-251)	1wun-T(33-250)	1wun-L	100	52,76,77,90,92,172
P13726	P08709	1boy-A(33-251)	1wv7-T(33-250)	1wv7-H	100	52,76,77,90,92,172
P13726	P08709	1boy-A(33-251)	1wv7-T(33-250)	1wv7-L	100	52,76,77,90,92,172
P13726	P08709	1boy-A(33-251)	1z6j-T(33-243)	1z6j-H	99	52,76,77,90,92,172
P13726	P08709	1boy-A(33-251)	1z6j-T(33-243)	1z6j-L	99	52,76,77,90,92,172
P13726	P08709	1boy-A(33-251)	2a2q-T(38-242)	2a2q-H	100	52,76,77,90,92,172
P13726	P08709	1boy-A(33-251)	2a2q-T(38-242)	2a2q-L	100	52,76,77,90,92,172
P13726	P08709	1boy-A(33-251)	2aei-T(33-243)	2aei-H	100	52,76,77,90,92,172
P13726	P08709	1boy-A(33-251)	2aei-T(33-243)	2aei-L	100	52,76,77,90,92,172
P13726	P08709	1boy-A(33-251)	2aer-T(38-242)	2aer-H	99	52,76,77,90,92,172
P13726	P08709	1boy-A(33-251)	2aer-T(38-242)	2aer-L	99	52,76,77,90,92,172
P13726	P08709	1boy-A(33-251)	2b7d-T(34-251)	2b7d-H	100	52,76,77,90,92,172
P13726	P08709	1boy-A(33-251)	2b7d-T(34-251)	2b7d-L	100	52,76,77,90,92,172
P13726	P08709	1boy-A(33-251)	2b8o-T(38-242)	2b8o-H	100	52,76,77,90,92,172
P13726	P08709	1boy-A(33-251)	2b8o-T(38-242)	2b8o-L	100	52,76,77,90,92,172
P13726	P08709	1boy-A(33-251)	2c4f-T(38-112)	2c4f-H	100	52,76,77,90,92,172
P13726	P08709	1boy-A(33-251)	2c4f-T(38-112)	2c4f-L	100	52,76,77,90,92,172
P13726	P08709	1boy-A(33-251)	2c4f-U(123-242)	2c4f-H	100	52,76,77,90,92,172
P13726	P08709	1boy-A(33-251)	2c4f-U(123-242)	2c4f-L	100	52,76,77,90,92,172
P13726	P08709	1boy-A(33-251)	2ec9-T(38-112)	2ec9-H	100	52,76,77,90,92,172
P13726	P08709	1boy-A(33-251)	2ec9-T(38-112)	2ec9-L	100	52,76,77,90,92,172
P13726	P08709	1boy-A(33-251)	2ec9-U(123-242)	2ec9-H	100	52,76,77,90,92,172
P13726	P08709	1boy-A(33-251)	2ec9-U(123-242)	2ec9-L	100	52,76,77,90,92,172
P13726	P08709	1boy-A(33-251)	2f9b-T(34-251)	2f9b-H	100	52,76,77,90,92,172
P13726	P08709	1boy-A(33-251)	2f9b-T(34-251)	2f9b-L	100	52,76,77,90,92,172
P13726	P08709	1boy-A(33-251)	2fir-T(38-242)	2fir-H	100	52,76,77,90,92,172
P13726	P08709	1boy-A(33-251)	2fir-T(38-242)	2fir-L	100	52,76,77,90,92,172
P13726	P08709	1boy-A(33-251)	2flb-T(34-251)	2flb-H	100	52,76,77,90,92,172
P13726	P08709	1boy-A(33-251)	2flb-T(34-251)	2flb-L	100	52,76,77,90,92,172
P13726	P08709	1boy-A(33-251)	2flr-T(34-251)	2flr-H	100	52,76,77,90,92,172
P13726	P08709	1boy-A(33-251)	2flr-T(34-251)	2flr-L	100	52,76,77,90,92,172
P13726	P08709	1boy-A(33-251)	2puq-T(38-241)	2puq-H	100	52,76,77,90,92,172
P13726	P08709	1boy-A(33-251)	2puq-T(38-241)	2puq-L	100	52,76,77,90,92,172
P13726	P08709	1boy-A(33-251)	2zp0-T(33-250)	2zp0-H	100	52,76,77,90,92,172
P13726	P08709	1boy-A(33-251)	2zp0-T(33-250)	2zp0-L	100	52,76,77,90,92,172
P13726	P08709	1boy-A(33-251)	2zwl-T(33-250)	2zwl-H	100	52,76,77,90,92,172
P13726	P08709	1boy-A(33-251)	2zwl-T(33-250)	2zwl-L	100	52,76,77,90,92,172
P13726	P08709	1boy-A(33-251)	2zzu-T(33-250)	2zzu-H	100	52,76,77,90,92,172
P13726	P08709	1boy-A(33-251)	2zzu-T(33-250)	2zzu-L	100	52,76,77,90,92,172
P13726	P08709	1boy-A(33-251)	3ela-T(33-241)	3ela-H	100	52,76,77,90,92,172
P13726	P08709	1boy-A(33-251)	3ela-T(33-241)	3ela-L	100	52,76,77,90,92,172
P13726	P08709	1boy-A(33-251)	3th2-T(38-242)	3th2-H	100	52,76,77,90,92,172
P13726	P08709	1boy-A(33-251)	3th2-T(38-242)	3th2-L	100	52,76,77,90,92,172
P13726	P08709	1boy-A(33-251)	3th3-T(38-242)	3th3-H	96	52,76,77,90,92,172
P13726	P08709	1boy-A(33-251)	3th3-T(38-242)	3th3-L	96	52,76,77,90,92,172
P13726	P08709	1boy-A(33-251)	3th4-T(38-242)	3th4-H	100	52,76,77,90,92,172
P13726	P08709	1boy-A(33-251)	3th4-T(38-242)	3th4-L	100	52,76,77,90,92,172
P13726	P08709	1boy-A(33-251)	4ibl-T(33-251)	4ibl-H	100	52,76,77,90,92,172
P13726	P08709	1boy-A(33-251)	4ibl-T(33-251)	4ibl-L	100	52,76,77,90,92,172
P13726	P08709	1boy-A(33-251)	4ylq-T(33-251)	4ylq-H	99	52,76,77,90,92,172
P13726	P08709	1boy-A(33-251)	4ylq-T(33-251)	4ylq-L	99	52,76,77,90,92,172
P13726	P08709	1boy-A(33-251)	4z6a-T(36-242)	4z6a-H	100	52,76,77,90,92,172
P13726	P08709	1boy-A(33-251)	4z6a-T(36-242)	4z6a-L	100	52,76,77,90,92,172
P13726	P08709	1boy-A(33-251)	4zma-T(33-251)	4zma-H	100	52,76,77,90,92,172
P13726	P08709	1boy-A(33-251)	4zma-T(33-251)	4zma-L	100	52,76,77,90,92,172
P13726	P08709	1boy-A(33-251)	6r2w-T(33-242)	6r2w-H	99	52,76,77,90,92,172
P13726	P08709	1boy-A(33-251)	6r2w-T(33-242)	6r2w-L	99	52,76,77,90,92,172
P16471	P01236	2lfg-A(123-234)	3d48-R(25-234)	3d48-P	86	212
P16471	P01236	2lfg-A(123-234)	3mzg-B(25-234)	3mzg-A	95	212
P16471	P01236	2lfg-A(123-234)	3n06-B(25-234)	3n06-A	95	212
P16471	P01236	2lfg-A(123-234)	3n0p-B(25-234)	3n0p-A	95	212
P16471	P01236	2lfg-A(123-234)	3ncb-B(25-234)	3ncb-A	95	212
P16471	P01236	2lfg-A(123-234)	3ncc-B(25-234)	3ncc-A	94	212
P16471	P01236	2lfg-A(123-234)	3nce-B(25-234)	3nce-A	94	212
P16471	P01236	2lfg-A(123-234)	3ncf-B(25-234)	3ncf-A	94	212
P21836	P0C1Z0	1c2b-A(35-574)	1ku6-A(32-580)	1ku6-B	99	103,155,317,328
P21836	P0C1Z0	1c2b-A(35-574)	1mah-A(32-574)	1mah-F	99	103,155,317,328
P25445	Q13158	1ddf-A(218-335)	3ezq-A(223-335)	3ezq-B	100	250,261,270,272,283,287
P25445	Q13158	1ddf-A(218-335)	3ezq-A(223-335)	3ezq-D	100	250,261,270,272,283,287
P25445	Q13158	1ddf-A(218-335)	3ezq-C(223-335)	3ezq-B	100	250,261,270,272,283,287
P25445	Q13158	1ddf-A(218-335)	3ezq-C(223-335)	3ezq-D	100	250,261,270,272,283,287
P25445	Q13158	1ddf-A(218-335)	3ezq-E(223-335)	3ezq-F	100	250,261,270,272,283,287
P25445	Q13158	1ddf-A(218-335)	3ezq-E(223-335)	3ezq-H	100	250,261,270,272,283,287
P25445	Q13158	1ddf-A(218-335)	3ezq-G(223-335)	3ezq-F	100	250,261,270,272,283,287
P25445	Q13158	1ddf-A(218-335)	3ezq-G(223-335)	3ezq-H	100	250,261,270,272,283,287
P25445	Q13158	1ddf-A(218-335)	3ezq-I(223-335)	3ezq-J	100	250,261,270,272,283,287
P25445	Q13158	1ddf-A(218-335)	3ezq-I(223-335)	3ezq-L	100	250,261,270,272,283,287
P25445	Q13158	1ddf-A(218-335)	3ezq-K(223-335)	3ezq-J	100	250,261,270,272,283,287
P25445	Q13158	1ddf-A(218-335)	3ezq-K(223-335)	3ezq-L	100	250,261,270,272,283,287
P25445	Q13158	1ddf-A(218-335)	3ezq-M(223-335)	3ezq-N	100	250,261,270,272,283,287
P25445	Q13158	1ddf-A(218-335)	3ezq-M(223-335)	3ezq-P	100	250,261,270,272,283,287
P25445	Q13158	1ddf-A(218-335)	3ezq-O(223-335)	3ezq-N	100	250,261,270,272,283,287
P25445	Q13158	1ddf-A(218-335)	3ezq-O(223-335)	3ezq-P	100	250,261,270,272,283,287
P32628	P54860	2nbu-A(1-78)	3m62-B(1-84)	3m62-A	100	45
P32851	P61765	2m8r-A(183-288)	3c98-B(1-267)	3c98-A	61	233
P32851	P61765	2m8r-A(183-288)	4jeh-B(24-266)	4jeh-A	60	233
P32851	P61765	2m8r-A(183-288)	4jeu-B(2-243)	4jeu-A	56	233
P35225	P78552	1ga3-A(35-146)	3bpo-A(74-146)	3bpo-C	98	47,66,137,140,141
P35225	P78552	1ga3-A(35-146)	5e4e-A(34-146)	5e4e-C	90	47,66,137,140,141
P35225	Q14627	1ga3-A(35-146)	3lb6-A(15-146)	3lb6-C	100	47,134,137,138
P35225	Q14627	1ga3-A(35-146)	3lb6-A(15-146)	3lb6-D	100	47,134,137,138
P35225	Q14627	1ga3-A(35-146)	3lb6-B(15-146)	3lb6-D	100	47,134,137,138
P40515	P47025	1y8m-A(1-138)	2pqn-A(1-129)	2pqn-B	100	80
P40515	P47025	1y8m-A(1-138)	3uux-A(1-129)	3uux-B	100	80
P40515	P47025	1y8m-A(1-138)	3uux-A(1-129)	3uux-D	100	80
P40515	P47025	1y8m-A(1-138)	3uux-C(1-129)	3uux-D	100	80
P48551	P01563	1n6u-A(28-237)	2hym-A(28-237)	2hym-B	100	71,73,104,107,127
P48551	P01563	1n6u-A(28-237)	2kz1-B(28-237)	2kz1-A	100	71,73,104,107,127
P48551	P01563	1n6u-A(28-237)	2lag-B(28-237)	2lag-A	100	71,73,104,107,127
P48551	P01563	1n6u-A(28-237)	3s9d-B(37-232)	3s9d-A	100	71,73,104,107,127
P48551	P01563	1n6u-A(28-237)	3s9d-D(37-232)	3s9d-C	100	71,73,104,107,127
P48551	P01563	1n6u-A(28-237)	3se3-C(34-232)	3se3-B	100	71,73,104,107,127
P49054	P00747	6okw-A(85-133)	1i5k-C(85-114)	1i5k-A	100	98
P49054	P00747	6okw-A(85-133)	1i5k-C(85-114)	1i5k-B	100	98
P49054	P00747	6okw-A(85-133)	1i5k-D(85-114)	1i5k-A	100	98
P49054	P00747	6okw-A(85-133)	1i5k-D(85-114)	1i5k-B	100	98
P49054	P00747	6okw-A(85-133)	2doh-C(85-113)	2doh-X	95	98
P49054	P00747	6okw-A(85-133)	2doi-B(85-113)	2doi-A	100	98
P49054	P00747	6okw-A(85-133)	2doi-C(85-113)	2doi-X	100	98
P49054	P00747	6okw-A(85-133)	6og4-C(76-150)	6og4-A	100	98
P49054	P00747	6okw-A(85-133)	6og4-C(76-150)	6og4-B	100	98
P49054	P00747	6okw-A(85-133)	6oqj-B(85-133)	6oqj-A	96	98
P49054	P00747	6okw-A(85-133)	6oqk-B(85-133)	6oqk-A	96	98
P53141	P19524	2fce-A(80-149)	1m45-A(2-149)	1m45-B	100	114
P53141	P19524	2fce-A(80-149)	1m46-A(2-149)	1m46-B	100	114
P53141	P19524	2fce-A(80-149)	1n2d-A(2-149)	1n2d-C	100	114
P53141	P19524	2fce-A(80-149)	1n2d-B(2-149)	1n2d-C	100	114
P54725	P12520	1oqy-A(2-363)	6xqi-F(2-363)	6xqi-A	100	333
P54725	P12520	1oqy-A(2-363)	6xqi-G(2-363)	6xqi-D	100	333
P60953	Q07960	1aje-A(1-187)	1am4-D(2-177)	1am4-A	98	32
P60953	Q07960	1aje-A(1-187)	1am4-E(2-177)	1am4-A	98	32
P60953	Q07960	1aje-A(1-187)	1am4-E(2-177)	1am4-B	98	32
P60953	Q07960	1aje-A(1-187)	1am4-E(2-177)	1am4-C	98	32
P60953	Q07960	1aje-A(1-187)	1am4-F(2-177)	1am4-C	98	32
P60953	Q07960	1aje-A(1-187)	1grn-A(1-191)	1grn-B	97	32
P60953	Q07960	1aje-A(1-187)	2ngr-A(1-191)	2ngr-B	97	32
P61964	Q15291	2h14-A(22-334)	6kiu-R(1-334)	6kiu-N	100	225,240
P61964	Q15291	2h14-A(22-334)	6kiv-R(1-334)	6kiv-N	100	225,240
P61964	Q15291	2h14-A(22-334)	6kiw-R(1-334)	6kiw-N	100	225,240
P61964	Q15291	2h14-A(22-334)	6kix-R(1-334)	6kix-N	100	225,240
P61964	Q15291	2h14-A(22-334)	6kiz-R(1-334)	6kiz-N	100	225,240
P61964	Q15291	2h14-A(22-334)	6pwv-B(22-334)	6pwv-A	100	225,240
P61964	Q15291	2h14-A(22-334)	6pww-B(22-334)	6pww-A	100	225,240
P61964	Q15291	2h14-A(22-334)	6w5i-B(22-334)	6w5i-A	100	225,240
P61964	Q15291	2h14-A(22-334)	6w5m-B(22-334)	6w5m-A	100	225,240
P61964	Q15291	2h14-A(22-334)	6w5n-B(22-334)	6w5n-A	100	225,240
P61964	Q15291	2h14-A(22-334)	7mbm-B(22-334)	7mbm-A	100	225,240
P61964	Q15291	2h14-A(22-334)	7mbn-B(22-334)	7mbn-A	100	225,240
P62593	O87916	1zg4-A(1-286)	1jtd-A(24-286)	1jtd-B	99	103,109,127
P62593	P35804	1zg4-A(1-286)	1jtg-A(24-286)	1jtg-B	100	102
P62593	P35804	1zg4-A(1-286)	1jtg-C(24-286)	1jtg-B	100	102
P62593	P35804	1zg4-A(1-286)	1jtg-C(24-286)	1jtg-D	100	102
P62593	P35804	1zg4-A(1-286)	1s0w-A(24-286)	1s0w-C	99	102
P62593	P35804	1zg4-A(1-286)	1s0w-B(24-286)	1s0w-D	99	102
P62593	P35804	1zg4-A(1-286)	1xxm-A(24-286)	1xxm-C	98	102
P62593	P35804	1zg4-A(1-286)	1xxm-B(24-286)	1xxm-D	98	102
P62593	P35804	1zg4-A(1-286)	2b5r-A(24-286)	2b5r-C	98	102
P62593	P35804	1zg4-A(1-286)	2b5r-A(24-286)	2b5r-D	98	102
P62593	P35804	1zg4-A(1-286)	2b5r-B(24-286)	2b5r-D	98	102
P62593	P35804	1zg4-A(1-286)	3c7u-A(24-286)	3c7u-B	100	102
P62593	P35804	1zg4-A(1-286)	3c7u-C(24-286)	3c7u-D	100	102
P62593	P35804	1zg4-A(1-286)	3c7v-A(24-286)	3c7v-B	100	102
P62593	P35804	1zg4-A(1-286)	3c7v-C(24-286)	3c7v-D	100	102
P63165	O75928	1a5r-A(1-101)	2asq-A(1-97)	2asq-B	100	36
P68036	Q05086	6xxu-A(1-154)	1c4z-D(1-154)	1c4z-A	100	63
P68390	P00766	1omt-A(130-185)	1cho-I(130-185)	1cho-F	100	146,148,150
P68390	P00766	1omt-A(130-185)	1cho-I(130-185)	1cho-G	100	146,148,150
P68390	P00766	1omt-A(130-185)	1hja-I(135-185)	1hja-B	98	146,148,150
P68390	P00766	1omt-A(130-185)	1hja-I(135-185)	1hja-C	98	146,148,150
P71590	P9WJK3	2lc1-A(430-527)	3oun-A(390-525)	3oun-B	100	459,474
P78560	Q9HB75	2o71-A(94-199)	2of5-A(94-199)	2of5-H	100	121,125,146,147,149,156,169
P78560	Q9HB75	2o71-A(94-199)	2of5-B(94-199)	2of5-H	100	121,125,146,147,149,156,169
P78560	Q9HB75	2o71-A(94-199)	2of5-B(94-199)	2of5-I	100	121,125,146,147,149,156,169
P78560	Q9HB75	2o71-A(94-199)	2of5-B(94-199)	2of5-J	100	121,125,146,147,149,156,169
P78560	Q9HB75	2o71-A(94-199)	2of5-C(94-199)	2of5-J	100	121,125,146,147,149,156,169
P78560	Q9HB75	2o71-A(94-199)	2of5-D(94-199)	2of5-J	100	121,125,146,147,149,156,169
P78560	Q9HB75	2o71-A(94-199)	2of5-D(94-199)	2of5-K	100	121,125,146,147,149,156,169
P78560	Q9HB75	2o71-A(94-199)	2of5-E(94-199)	2of5-H	100	121,125,146,147,149,156,169
P78560	Q9HB75	2o71-A(94-199)	2of5-E(94-199)	2of5-J	100	121,125,146,147,149,156,169
P78560	Q9HB75	2o71-A(94-199)	2of5-E(94-199)	2of5-K	100	121,125,146,147,149,156,169
P78560	Q9HB75	2o71-A(94-199)	2of5-E(94-199)	2of5-L	100	121,125,146,147,149,156,169
Q01196	Q13951	1co1-A(61-175)	1e50-A(50-183)	1e50-B	98	106,107,109,161
Q01196	Q13951	1co1-A(61-175)	1e50-A(50-183)	1e50-D	98	106,107,109,161
Q01196	Q13951	1co1-A(61-175)	1e50-C(50-183)	1e50-B	100	106,107,109,161
Q01196	Q13951	1co1-A(61-175)	1e50-C(50-183)	1e50-D	100	106,107,109,161
Q01196	Q13951	1co1-A(61-175)	1e50-E(50-183)	1e50-F	100	106,107,109,161
Q01196	Q13951	1co1-A(61-175)	1e50-E(50-183)	1e50-H	100	106,107,109,161
Q01196	Q13951	1co1-A(61-175)	1e50-G(50-183)	1e50-F	100	106,107,109,161
Q01196	Q13951	1co1-A(61-175)	1e50-G(50-183)	1e50-H	100	106,107,109,161
Q01196	Q13951	1co1-A(61-175)	1e50-Q(50-183)	1e50-D	100	106,107,109,161
Q01196	Q13951	1co1-A(61-175)	1e50-R(50-183)	1e50-F	100	106,107,109,161
Q01196	Q13951	1co1-A(61-175)	1h9d-A(50-183)	1h9d-B	100	106,107,109,161
Q01196	Q13951	1co1-A(61-175)	1h9d-C(50-183)	1h9d-D	100	106,107,109,161
Q07812	Q07820	1f16-A(1-192)	3pk1-B(48-81)	3pk1-A	100	74
Q07812	Q07820	1f16-A(1-192)	3pk1-D(48-81)	3pk1-C	100	74
Q13241	P13747	1b6e-A(52-179)	3cdg-E(57-179)	3cdg-A	100	112,114,160,162
Q13241	P13747	1b6e-A(52-179)	3cdg-E(57-179)	3cdg-C	100	112,114,160,162
Q13241	P13747	1b6e-A(52-179)	3cdg-J(57-179)	3cdg-A	100	112,114,160,162
Q13241	P13747	1b6e-A(52-179)	3cdg-J(57-179)	3cdg-C	100	112,114,160,162
Q13241	P13747	1b6e-A(52-179)	3cii-G(59-179)	3cii-A	100	112,114,160,162
Q13241	P13747	1b6e-A(52-179)	3cii-G(59-179)	3cii-D	100	112,114,160,162
Q13241	P13747	1b6e-A(52-179)	3cii-I(59-179)	3cii-A	100	112,114,160,162
Q13241	P13747	1b6e-A(52-179)	3cii-I(59-179)	3cii-D	100	112,114,160,162
Q13951	Q01196	1cl3-A(4-141)	1e50-B(2-135)	1e50-A	96	104
Q13951	Q01196	1cl3-A(4-141)	1e50-D(2-135)	1e50-C	96	104
Q13951	Q01196	1cl3-A(4-141)	1e50-D(2-135)	1e50-Q	96	104
Q13951	Q01196	1cl3-A(4-141)	1e50-F(2-135)	1e50-E	96	104
Q13951	Q01196	1cl3-A(4-141)	1e50-F(2-135)	1e50-R	96	104
Q13951	Q01196	1cl3-A(4-141)	1e50-H(2-135)	1e50-G	96	104
Q13951	Q01196	1cl3-A(4-141)	1h9d-B(2-135)	1h9d-A	96	104
Q13951	Q01196	1cl3-A(4-141)	1h9d-D(2-135)	1h9d-C	96	104
Q14116	Q13478	1j0s-A(37-193)	3wo3-A(37-193)	3wo3-B	100	144,145,148
Q14116	Q13478	1j0s-A(37-193)	3wo3-A(37-193)	3wo3-D	100	144,145,148
Q14116	Q13478	1j0s-A(37-193)	3wo3-C(37-193)	3wo3-B	100	144,145,148
Q14116	Q13478	1j0s-A(37-193)	3wo3-C(37-193)	3wo3-D	100	144,145,148
Q14116	Q13478	1j0s-A(37-193)	3wo3-E(37-193)	3wo3-F	100	144,145,148
Q14116	Q13478	1j0s-A(37-193)	3wo3-E(37-193)	3wo3-H	100	144,145,148
Q14116	Q13478	1j0s-A(37-193)	3wo3-G(37-193)	3wo3-F	100	144,145,148
Q14116	Q13478	1j0s-A(37-193)	3wo3-G(37-193)	3wo3-H	100	144,145,148
Q14116	Q13478	1j0s-A(37-193)	3wo3-I(37-193)	3wo3-J	100	144,145,148
Q14116	Q13478	1j0s-A(37-193)	3wo3-I(37-193)	3wo3-L	100	144,145,148
Q14116	Q13478	1j0s-A(37-193)	3wo3-K(37-193)	3wo3-J	100	144,145,148
Q14116	Q13478	1j0s-A(37-193)	3wo3-K(37-193)	3wo3-L	100	144,145,148
Q14116	Q13478	1j0s-A(37-193)	3wo4-A(37-193)	3wo4-B	100	144,145,148
Q14116	Q13478	1j0s-A(37-193)	4r6u-B(37-193)	4r6u-A	97	144,145,148
Q14116	Q13478	1j0s-A(37-193)	4r6u-B(37-193)	4r6u-C	97	144,145,148
Q14116	Q13478	1j0s-A(37-193)	4r6u-D(37-193)	4r6u-A	97	144,145,148
Q14145	Q16236	4ifj-A(321-609)	2flu-X(321-609)	2flu-P	100	334,380,382,415,436,483,525,572
Q14145	Q16236	4ifj-A(321-609)	4ifl-X(321-609)	4ifl-P	100	334,380,382,415,436,483,525,572
Q14203	P30622	2coy-A(1-99)	2hqh-A(15-107)	2hqh-E	100	68,90
Q14203	P30622	2coy-A(1-99)	2hqh-A(15-107)	2hqh-H	100	68,90
Q14203	P30622	2coy-A(1-99)	2hqh-B(15-107)	2hqh-E	100	68,90
Q14203	P30622	2coy-A(1-99)	2hqh-B(15-107)	2hqh-F	100	68,90
Q14203	P30622	2coy-A(1-99)	2hqh-C(15-107)	2hqh-G	100	68,90
Q14203	P30622	2coy-A(1-99)	2hqh-D(15-107)	2hqh-H	100	68,90
Q14203	P30622	2coy-A(1-99)	3e2u-A(18-111)	3e2u-E	100	68,90
Q14203	P30622	2coy-A(1-99)	3e2u-A(18-111)	3e2u-G	100	68,90
Q14203	P30622	2coy-A(1-99)	3e2u-B(18-111)	3e2u-F	100	68,90
Q14203	P30622	2coy-A(1-99)	3e2u-B(18-111)	3e2u-H	100	68,90
Q14203	P30622	2coy-A(1-99)	3e2u-C(18-111)	3e2u-F	100	68,90
Q14203	P30622	2coy-A(1-99)	3e2u-C(18-111)	3e2u-G	100	68,90
Q14203	P30622	2coy-A(1-99)	3e2u-D(18-111)	3e2u-E	100	68,90
Q14203	P30622	2coy-A(1-99)	3e2u-D(18-111)	3e2u-H	100	68,90
Q15257	P67775	2ixm-A(20-357)	4lac-B(19-358)	4lac-C	99	305,325,329
Q15750	P98170	2j4o-A(1-401)	2pop-A(1-370)	2pop-B	99	213,216
Q15750	P98170	2j4o-A(1-401)	2pop-C(1-370)	2pop-D	100	213,216
Q16512	D0ZVG2	1urf-A(122-199)	4nkg-B(122-199)	4nkg-A	100	181,185
Q16512	D0ZVG2	1urf-A(122-199)	4nkg-D(122-199)	4nkg-C	100	181,185
Q27974	P19120	1n4c-A(737-910)	2qwn-B(812-905)	2qwn-A	98	876
Q27974	P19120	1n4c-A(737-910)	2qwo-B(813-904)	2qwo-A	98	876
Q27974	P19120	1n4c-A(737-910)	2qwp-B(813-904)	2qwp-A	98	876
Q27974	P19120	1n4c-A(737-910)	2qwq-B(813-904)	2qwq-A	98	876
Q27974	P19120	1n4c-A(737-910)	2qwr-B(813-904)	2qwr-A	98	876
Q53EL6	P60842	2ggf-A(327-450)	2zu6-B(163-469)	2zu6-A	88	358
Q53EL6	P60842	2ggf-A(327-450)	2zu6-B(163-469)	2zu6-C	88	358
Q53EL6	P60842	2ggf-A(327-450)	2zu6-E(163-469)	2zu6-D	88	358
Q53EL6	P60842	2ggf-A(327-450)	2zu6-E(163-469)	2zu6-F	88	358
Q5D734	P12643	2mbk-A(28-93)	3bk3-C(28-93)	3bk3-A	100	48
Q5D734	P12643	2mbk-A(28-93)	3bk3-C(28-93)	3bk3-B	100	48
Q5D734	P12643	2mbk-A(28-93)	3bk3-D(28-93)	3bk3-A	100	48
Q5D734	P12643	2mbk-A(28-93)	3bk3-D(28-93)	3bk3-B	100	48
Q7A260	P38446	1j57-A(2-135)	2o3b-B(2-135)	2o3b-A	100	24,74,75,76
Q8N0X7	P53990	2dl1-A(9-111)	4u7i-A(8-101)	4u7i-B	100	24
Q931F4	P01024	2jvg-A(198-266)	6rmu-C(198-266)	6rmu-A	100	231,238
Q931F4	P01024	2jvg-A(198-266)	6rmu-D(198-266)	6rmu-B	100	231,238
Q96EP0	Q96BN8	4p09-A(1-179)	4oyk-A(3-179)	4oyk-C	99	82,102
Q96EP0	Q96BN8	4p09-A(1-179)	4oyk-B(3-179)	4oyk-D	100	82,102
Q9BUL8	Q9BSQ5	3l8j-A(14-212)	4tvq-C(1-212)	4tvq-E	97	135,175
Q9H3P7	Q9UBF8	2n72-A(241-308)	2n73-A(241-308)	2n73-B	100	258,284,285,288
Q9NPD8	Q9NW38	1yh2-A(1-167)	4ccg-A(1-197)	4ccg-X	99	60
Q9NPD8	Q9NW38	1yh2-A(1-167)	4ccg-A(1-197)	4ccg-Y	99	60
Q9NPD8	Q9NW38	1yh2-A(1-167)	4ccg-B(1-197)	4ccg-X	99	60
Q9NPD8	Q9NW38	1yh2-A(1-167)	4ccg-B(1-197)	4ccg-Y	99	60
Q9UJY5	Q15276	1oxz-A(141-326)	1x79-A(210-302)	1x79-B	100	259,260,264,267,277,281,284
Q9UJY5	Q15276	1oxz-A(141-326)	1x79-A(210-302)	1x79-C	100	259,260,264,267,277,281,284
Q9ULZ3	Q9ULZ3	2kn6-A(1-195)	3j63-A(1-91)	3j63-B	100	8,12,15,19,20,21,23,25,26,27,40,41,45,47,48,51,52,56,62,67,68,72,76
Q9ULZ3	Q9ULZ3	2kn6-A(1-195)	3j63-A(1-91)	3j63-L	100	8,12,15,19,20,21,23,25,26,27,40,41,45,47,48,51,52,56,62,67,68,72,76
Q9ULZ3	Q9ULZ3	2kn6-A(1-195)	3j63-A(1-91)	3j63-M	100	8,12,15,19,20,21,23,25,26,27,40,41,45,47,48,51,52,56,62,67,68,72,76
Q9ULZ3	Q9ULZ3	2kn6-A(1-195)	3j63-B(1-91)	3j63-C	100	8,12,15,19,20,21,23,25,26,27,40,41,45,47,48,51,52,56,62,67,68,72,76
Q9ULZ3	Q9ULZ3	2kn6-A(1-195)	3j63-B(1-91)	3j63-F	100	8,12,15,19,20,21,23,25,26,27,40,41,45,47,48,51,52,56,62,67,68,72,76
Q9ULZ3	Q9ULZ3	2kn6-A(1-195)	3j63-B(1-91)	3j63-M	100	8,12,15,19,20,21,23,25,26,27,40,41,45,47,48,51,52,56,62,67,68,72,76
Q9ULZ3	Q9ULZ3	2kn6-A(1-195)	3j63-B(1-91)	3j63-N	100	8,12,15,19,20,21,23,25,26,27,40,41,45,47,48,51,52,56,62,67,68,72,76
Q9ULZ3	Q9ULZ3	2kn6-A(1-195)	3j63-C(1-91)	3j63-D	100	8,12,15,19,20,21,23,25,26,27,40,41,45,47,48,51,52,56,62,67,68,72,76
Q9ULZ3	Q9ULZ3	2kn6-A(1-195)	3j63-C(1-91)	3j63-F	100	8,12,15,19,20,21,23,25,26,27,40,41,45,47,48,51,52,56,62,67,68,72,76
Q9ULZ3	Q9ULZ3	2kn6-A(1-195)	3j63-C(1-91)	3j63-G	100	8,12,15,19,20,21,23,25,26,27,40,41,45,47,48,51,52,56,62,67,68,72,76
Q9ULZ3	Q9ULZ3	2kn6-A(1-195)	3j63-C(1-91)	3j63-N	100	8,12,15,19,20,21,23,25,26,27,40,41,45,47,48,51,52,56,62,67,68,72,76
Q9ULZ3	Q9ULZ3	2kn6-A(1-195)	3j63-C(1-91)	3j63-O	100	8,12,15,19,20,21,23,25,26,27,40,41,45,47,48,51,52,56,62,67,68,72,76
Q9ULZ3	Q9ULZ3	2kn6-A(1-195)	3j63-D(1-91)	3j63-E	100	8,12,15,19,20,21,23,25,26,27,40,41,45,47,48,51,52,56,62,67,68,72,76
Q9ULZ3	Q9ULZ3	2kn6-A(1-195)	3j63-D(1-91)	3j63-G	100	8,12,15,19,20,21,23,25,26,27,40,41,45,47,48,51,52,56,62,67,68,72,76
Q9ULZ3	Q9ULZ3	2kn6-A(1-195)	3j63-D(1-91)	3j63-H	100	8,12,15,19,20,21,23,25,26,27,40,41,45,47,48,51,52,56,62,67,68,72,76
Q9ULZ3	Q9ULZ3	2kn6-A(1-195)	3j63-D(1-91)	3j63-O	100	8,12,15,19,20,21,23,25,26,27,40,41,45,47,48,51,52,56,62,67,68,72,76
Q9ULZ3	Q9ULZ3	2kn6-A(1-195)	3j63-E(1-91)	3j63-H	100	8,12,15,19,20,21,23,25,26,27,40,41,45,47,48,51,52,56,62,67,68,72,76
Q9ULZ3	Q9ULZ3	2kn6-A(1-195)	3j63-E(1-91)	3j63-I	100	8,12,15,19,20,21,23,25,26,27,40,41,45,47,48,51,52,56,62,67,68,72,76
Q9ULZ3	Q9ULZ3	2kn6-A(1-195)	3j63-F(1-91)	3j63-G	100	8,12,15,19,20,21,23,25,26,27,40,41,45,47,48,51,52,56,62,67,68,72,76
Q9ULZ3	Q9ULZ3	2kn6-A(1-195)	3j63-G(1-91)	3j63-H	100	8,12,15,19,20,21,23,25,26,27,40,41,45,47,48,51,52,56,62,67,68,72,76
Q9ULZ3	Q9ULZ3	2kn6-A(1-195)	3j63-G(1-91)	3j63-K	100	8,12,15,19,20,21,23,25,26,27,40,41,45,47,48,51,52,56,62,67,68,72,76
Q9ULZ3	Q9ULZ3	2kn6-A(1-195)	3j63-H(1-91)	3j63-I	100	8,12,15,19,20,21,23,25,26,27,40,41,45,47,48,51,52,56,62,67,68,72,76
Q9ULZ3	Q9ULZ3	2kn6-A(1-195)	3j63-H(1-91)	3j63-K	100	8,12,15,19,20,21,23,25,26,27,40,41,45,47,48,51,52,56,62,67,68,72,76
Q9ULZ3	Q9ULZ3	2kn6-A(1-195)	3j63-H(1-91)	3j63-L	100	8,12,15,19,20,21,23,25,26,27,40,41,45,47,48,51,52,56,62,67,68,72,76
Q9ULZ3	Q9ULZ3	2kn6-A(1-195)	3j63-I(1-91)	3j63-J	100	8,12,15,19,20,21,23,25,26,27,40,41,45,47,48,51,52,56,62,67,68,72,76
Q9ULZ3	Q9ULZ3	2kn6-A(1-195)	3j63-I(1-91)	3j63-L	100	8,12,15,19,20,21,23,25,26,27,40,41,45,47,48,51,52,56,62,67,68,72,76
Q9ULZ3	Q9ULZ3	2kn6-A(1-195)	3j63-I(1-91)	3j63-M	100	8,12,15,19,20,21,23,25,26,27,40,41,45,47,48,51,52,56,62,67,68,72,76
Q9ULZ3	Q9ULZ3	2kn6-A(1-195)	3j63-J(1-91)	3j63-M	100	8,12,15,19,20,21,23,25,26,27,40,41,45,47,48,51,52,56,62,67,68,72,76
Q9ULZ3	Q9ULZ3	2kn6-A(1-195)	3j63-J(1-91)	3j63-N	100	8,12,15,19,20,21,23,25,26,27,40,41,45,47,48,51,52,56,62,67,68,72,76
Q9ULZ3	Q9ULZ3	2kn6-A(1-195)	3j63-K(1-91)	3j63-L	100	8,12,15,19,20,21,23,25,26,27,40,41,45,47,48,51,52,56,62,67,68,72,76
Q9ULZ3	Q9ULZ3	2kn6-A(1-195)	3j63-L(1-91)	3j63-M	100	8,12,15,19,20,21,23,25,26,27,40,41,45,47,48,51,52,56,62,67,68,72,76
Q9ULZ3	Q9ULZ3	2kn6-A(1-195)	3j63-M(1-91)	3j63-N	100	8,12,15,19,20,21,23,25,26,27,40,41,45,47,48,51,52,56,62,67,68,72,76
Q9ULZ3	Q9ULZ3	2kn6-A(1-195)	3j63-N(1-91)	3j63-O	100	8,12,15,19,20,21,23,25,26,27,40,41,45,47,48,51,52,56,62,67,68,72,76
Q9ULZ3	Q9ULZ3	2kn6-A(1-195)	6k99-A(112-194)	6k99-C	100	8,12,15,19,20,21,23,25,26,27,40,41,45,47,48,51,52,56,62,67,68,72,76
Q9ULZ3	Q9ULZ3	2kn6-A(1-195)	6k99-A(112-194)	6k99-E	100	8,12,15,19,20,21,23,25,26,27,40,41,45,47,48,51,52,56,62,67,68,72,76
Q9ULZ3	Q9ULZ3	2kn6-A(1-195)	6k99-A(112-194)	6k99-F	100	8,12,15,19,20,21,23,25,26,27,40,41,45,47,48,51,52,56,62,67,68,72,76
Q9ULZ3	Q9ULZ3	2kn6-A(1-195)	6k99-A(112-194)	6k99-G	100	8,12,15,19,20,21,23,25,26,27,40,41,45,47,48,51,52,56,62,67,68,72,76
Q9ULZ3	Q9ULZ3	2kn6-A(1-195)	6k99-A(112-194)	6k99-I	100	8,12,15,19,20,21,23,25,26,27,40,41,45,47,48,51,52,56,62,67,68,72,76
Q9ULZ3	Q9ULZ3	2kn6-A(1-195)	6k99-A(112-194)	6k99-J	100	8,12,15,19,20,21,23,25,26,27,40,41,45,47,48,51,52,56,62,67,68,72,76
Q9ULZ3	Q9ULZ3	2kn6-A(1-195)	6k99-B(112-194)	6k99-F	100	8,12,15,19,20,21,23,25,26,27,40,41,45,47,48,51,52,56,62,67,68,72,76
Q9ULZ3	Q9ULZ3	2kn6-A(1-195)	6k99-B(112-194)	6k99-G	100	8,12,15,19,20,21,23,25,26,27,40,41,45,47,48,51,52,56,62,67,68,72,76
Q9ULZ3	Q9ULZ3	2kn6-A(1-195)	6k99-B(112-194)	6k99-H	100	8,12,15,19,20,21,23,25,26,27,40,41,45,47,48,51,52,56,62,67,68,72,76
Q9ULZ3	Q9ULZ3	2kn6-A(1-195)	6k99-C(112-194)	6k99-F	100	8,12,15,19,20,21,23,25,26,27,40,41,45,47,48,51,52,56,62,67,68,72,76
Q9ULZ3	Q9ULZ3	2kn6-A(1-195)	6k99-C(112-194)	6k99-H	100	8,12,15,19,20,21,23,25,26,27,40,41,45,47,48,51,52,56,62,67,68,72,76
Q9ULZ3	Q9ULZ3	2kn6-A(1-195)	6k99-C(112-194)	6k99-J	100	8,12,15,19,20,21,23,25,26,27,40,41,45,47,48,51,52,56,62,67,68,72,76
Q9ULZ3	Q9ULZ3	2kn6-A(1-195)	6k99-D(112-194)	6k99-E	100	8,12,15,19,20,21,23,25,26,27,40,41,45,47,48,51,52,56,62,67,68,72,76
Q9ULZ3	Q9ULZ3	2kn6-A(1-195)	6k99-D(112-194)	6k99-K	100	8,12,15,19,20,21,23,25,26,27,40,41,45,47,48,51,52,56,62,67,68,72,76
Q9ULZ3	Q9ULZ3	2kn6-A(1-195)	6k99-D(112-194)	6k99-L	100	8,12,15,19,20,21,23,25,26,27,40,41,45,47,48,51,52,56,62,67,68,72,76
Q9ULZ3	Q9ULZ3	2kn6-A(1-195)	6k99-E(112-194)	6k99-G	100	8,12,15,19,20,21,23,25,26,27,40,41,45,47,48,51,52,56,62,67,68,72,76
Q9ULZ3	Q9ULZ3	2kn6-A(1-195)	6k99-E(112-194)	6k99-I	100	8,12,15,19,20,21,23,25,26,27,40,41,45,47,48,51,52,56,62,67,68,72,76
Q9ULZ3	Q9ULZ3	2kn6-A(1-195)	6k99-E(112-194)	6k99-L	100	8,12,15,19,20,21,23,25,26,27,40,41,45,47,48,51,52,56,62,67,68,72,76
Q9ULZ3	Q9ULZ3	2kn6-A(1-195)	6k99-F(112-194)	6k99-G	100	8,12,15,19,20,21,23,25,26,27,40,41,45,47,48,51,52,56,62,67,68,72,76
Q9ULZ3	Q9ULZ3	2kn6-A(1-195)	6k99-G(112-194)	6k99-H	100	8,12,15,19,20,21,23,25,26,27,40,41,45,47,48,51,52,56,62,67,68,72,76
Q9ULZ3	Q9ULZ3	2kn6-A(1-195)	6k99-G(112-194)	6k99-L	100	8,12,15,19,20,21,23,25,26,27,40,41,45,47,48,51,52,56,62,67,68,72,76
Q9ULZ3	Q9ULZ3	2kn6-A(1-195)	6k99-H(112-194)	6k99-J	100	8,12,15,19,20,21,23,25,26,27,40,41,45,47,48,51,52,56,62,67,68,72,76
Q9ULZ3	Q9ULZ3	2kn6-A(1-195)	6k99-H(112-194)	6k99-L	100	8,12,15,19,20,21,23,25,26,27,40,41,45,47,48,51,52,56,62,67,68,72,76
Q9ULZ3	Q9ULZ3	2kn6-A(1-195)	6k99-I(112-194)	6k99-J	100	8,12,15,19,20,21,23,25,26,27,40,41,45,47,48,51,52,56,62,67,68,72,76
Q9ULZ3	Q9ULZ3	2kn6-A(1-195)	6k99-I(112-194)	6k99-K	100	8,12,15,19,20,21,23,25,26,27,40,41,45,47,48,51,52,56,62,67,68,72,76
Q9ULZ3	Q9ULZ3	2kn6-A(1-195)	6k99-J(112-194)	6k99-K	100	8,12,15,19,20,21,23,25,26,27,40,41,45,47,48,51,52,56,62,67,68,72,76
Q9ULZ3	Q9ULZ3	2kn6-A(1-195)	6k99-J(112-194)	6k99-L	100	8,12,15,19,20,21,23,25,26,27,40,41,45,47,48,51,52,56,62,67,68,72,76
Q9ULZ3	Q9ULZ3	2kn6-A(1-195)	6k99-K(112-194)	6k99-L	100	8,12,15,19,20,21,23,25,26,27,40,41,45,47,48,51,52,56,62,67,68,72,76
Q9ULZ3	Q9ULZ3	2kn6-A(1-195)	6ki0-A(112-195)	6ki0-B	49	8,12,15,19,20,21,23,25,26,27,40,41,45,47,48,51,52,56,62,67,68,72,76
Q9ULZ3	Q9ULZ3	2kn6-A(1-195)	6ki0-B(112-195)	6ki0-A	49	8,12,15,19,20,21,23,25,26,27,40,41,45,47,48,51,52,56,62,67,68,72,76
Q9ULZ3	Q9ULZ3	2kn6-A(1-195)	6n1h-A(112-194)	6n1h-B	100	8,12,15,19,20,21,23,25,26,27,40,41,45,47,48,51,52,56,62,67,68,72,76
Q9ULZ3	Q9ULZ3	2kn6-A(1-195)	6n1h-A(112-194)	6n1h-D	100	8,12,15,19,20,21,23,25,26,27,40,41,45,47,48,51,52,56,62,67,68,72,76
Q9ULZ3	Q9ULZ3	2kn6-A(1-195)	6n1h-A(112-194)	6n1h-E	100	8,12,15,19,20,21,23,25,26,27,40,41,45,47,48,51,52,56,62,67,68,72,76
Q9ULZ3	Q9ULZ3	2kn6-A(1-195)	6n1h-B(112-194)	6n1h-C	100	8,12,15,19,20,21,23,25,26,27,40,41,45,47,48,51,52,56,62,67,68,72,76
Q9ULZ3	Q9ULZ3	2kn6-A(1-195)	6n1h-B(112-194)	6n1h-E	100	8,12,15,19,20,21,23,25,26,27,40,41,45,47,48,51,52,56,62,67,68,72,76
Q9ULZ3	Q9ULZ3	2kn6-A(1-195)	6n1h-B(112-194)	6n1h-F	100	8,12,15,19,20,21,23,25,26,27,40,41,45,47,48,51,52,56,62,67,68,72,76
Q9ULZ3	Q9ULZ3	2kn6-A(1-195)	6n1h-C(112-194)	6n1h-D	100	8,12,15,19,20,21,23,25,26,27,40,41,45,47,48,51,52,56,62,67,68,72,76
Q9ULZ3	Q9ULZ3	2kn6-A(1-195)	6n1h-C(112-194)	6n1h-F	100	8,12,15,19,20,21,23,25,26,27,40,41,45,47,48,51,52,56,62,67,68,72,76
Q9ULZ3	Q9ULZ3	2kn6-A(1-195)	6n1h-C(112-194)	6n1h-G	100	8,12,15,19,20,21,23,25,26,27,40,41,45,47,48,51,52,56,62,67,68,72,76
Q9ULZ3	Q9ULZ3	2kn6-A(1-195)	6n1h-D(112-194)	6n1h-E	100	8,12,15,19,20,21,23,25,26,27,40,41,45,47,48,51,52,56,62,67,68,72,76
Q9ULZ3	Q9ULZ3	2kn6-A(1-195)	6n1h-D(112-194)	6n1h-G	100	8,12,15,19,20,21,23,25,26,27,40,41,45,47,48,51,52,56,62,67,68,72,76
Q9ULZ3	Q9ULZ3	2kn6-A(1-195)	6n1h-D(112-194)	6n1h-H	100	8,12,15,19,20,21,23,25,26,27,40,41,45,47,48,51,52,56,62,67,68,72,76
Q9ULZ3	Q9ULZ3	2kn6-A(1-195)	6n1h-E(112-194)	6n1h-F	100	8,12,15,19,20,21,23,25,26,27,40,41,45,47,48,51,52,56,62,67,68,72,76
Q9ULZ3	Q9ULZ3	2kn6-A(1-195)	6n1h-E(112-194)	6n1h-H	100	8,12,15,19,20,21,23,25,26,27,40,41,45,47,48,51,52,56,62,67,68,72,76
Q9ULZ3	Q9ULZ3	2kn6-A(1-195)	6n1h-E(112-194)	6n1h-I	100	8,12,15,19,20,21,23,25,26,27,40,41,45,47,48,51,52,56,62,67,68,72,76
Q9ULZ3	Q9ULZ3	2kn6-A(1-195)	6n1h-F(112-194)	6n1h-G	100	8,12,15,19,20,21,23,25,26,27,40,41,45,47,48,51,52,56,62,67,68,72,76
Q9ULZ3	Q9ULZ3	2kn6-A(1-195)	6n1h-F(112-194)	6n1h-I	100	8,12,15,19,20,21,23,25,26,27,40,41,45,47,48,51,52,56,62,67,68,72,76
Q9ULZ3	Q9ULZ3	2kn6-A(1-195)	6n1h-F(112-194)	6n1h-J	100	8,12,15,19,20,21,23,25,26,27,40,41,45,47,48,51,52,56,62,67,68,72,76
Q9ULZ3	Q9ULZ3	2kn6-A(1-195)	6n1h-G(112-194)	6n1h-H	100	8,12,15,19,20,21,23,25,26,27,40,41,45,47,48,51,52,56,62,67,68,72,76
Q9ULZ3	Q9ULZ3	2kn6-A(1-195)	6n1h-G(112-194)	6n1h-J	100	8,12,15,19,20,21,23,25,26,27,40,41,45,47,48,51,52,56,62,67,68,72,76
Q9ULZ3	Q9ULZ3	2kn6-A(1-195)	6n1h-G(112-194)	6n1h-K	100	8,12,15,19,20,21,23,25,26,27,40,41,45,47,48,51,52,56,62,67,68,72,76
Q9ULZ3	Q9ULZ3	2kn6-A(1-195)	6n1h-H(112-194)	6n1h-I	100	8,12,15,19,20,21,23,25,26,27,40,41,45,47,48,51,52,56,62,67,68,72,76
Q9ULZ3	Q9ULZ3	2kn6-A(1-195)	6n1h-H(112-194)	6n1h-K	100	8,12,15,19,20,21,23,25,26,27,40,41,45,47,48,51,52,56,62,67,68,72,76
Q9ULZ3	Q9ULZ3	2kn6-A(1-195)	6n1h-H(112-194)	6n1h-L	100	8,12,15,19,20,21,23,25,26,27,40,41,45,47,48,51,52,56,62,67,68,72,76
Q9ULZ3	Q9ULZ3	2kn6-A(1-195)	6n1h-I(112-194)	6n1h-J	100	8,12,15,19,20,21,23,25,26,27,40,41,45,47,48,51,52,56,62,67,68,72,76
Q9ULZ3	Q9ULZ3	2kn6-A(1-195)	6n1h-I(112-194)	6n1h-L	100	8,12,15,19,20,21,23,25,26,27,40,41,45,47,48,51,52,56,62,67,68,72,76
Q9ULZ3	Q9ULZ3	2kn6-A(1-195)	6n1h-I(112-194)	6n1h-M	100	8,12,15,19,20,21,23,25,26,27,40,41,45,47,48,51,52,56,62,67,68,72,76
Q9ULZ3	Q9ULZ3	2kn6-A(1-195)	6n1h-J(112-194)	6n1h-K	100	8,12,15,19,20,21,23,25,26,27,40,41,45,47,48,51,52,56,62,67,68,72,76
Q9ULZ3	Q9ULZ3	2kn6-A(1-195)	6n1h-J(112-194)	6n1h-M	100	8,12,15,19,20,21,23,25,26,27,40,41,45,47,48,51,52,56,62,67,68,72,76
Q9ULZ3	Q9ULZ3	2kn6-A(1-195)	6n1h-J(112-194)	6n1h-N	100	8,12,15,19,20,21,23,25,26,27,40,41,45,47,48,51,52,56,62,67,68,72,76
Q9ULZ3	Q9ULZ3	2kn6-A(1-195)	6n1h-K(112-194)	6n1h-L	100	8,12,15,19,20,21,23,25,26,27,40,41,45,47,48,51,52,56,62,67,68,72,76
Q9ULZ3	Q9ULZ3	2kn6-A(1-195)	6n1h-K(112-194)	6n1h-N	100	8,12,15,19,20,21,23,25,26,27,40,41,45,47,48,51,52,56,62,67,68,72,76
Q9ULZ3	Q9ULZ3	2kn6-A(1-195)	6n1h-K(112-194)	6n1h-O	100	8,12,15,19,20,21,23,25,26,27,40,41,45,47,48,51,52,56,62,67,68,72,76
Q9ULZ3	Q9ULZ3	2kn6-A(1-195)	6n1h-L(112-194)	6n1h-M	100	8,12,15,19,20,21,23,25,26,27,40,41,45,47,48,51,52,56,62,67,68,72,76
Q9ULZ3	Q9ULZ3	2kn6-A(1-195)	6n1h-L(112-194)	6n1h-O	100	8,12,15,19,20,21,23,25,26,27,40,41,45,47,48,51,52,56,62,67,68,72,76
Q9ULZ3	Q9ULZ3	2kn6-A(1-195)	6n1h-L(112-194)	6n1h-P	100	8,12,15,19,20,21,23,25,26,27,40,41,45,47,48,51,52,56,62,67,68,72,76
Q9ULZ3	Q9ULZ3	2kn6-A(1-195)	6n1h-M(112-194)	6n1h-N	100	8,12,15,19,20,21,23,25,26,27,40,41,45,47,48,51,52,56,62,67,68,72,76
Q9ULZ3	Q9ULZ3	2kn6-A(1-195)	6n1h-M(112-194)	6n1h-P	100	8,12,15,19,20,21,23,25,26,27,40,41,45,47,48,51,52,56,62,67,68,72,76
Q9ULZ3	Q9ULZ3	2kn6-A(1-195)	6n1h-N(112-194)	6n1h-O	100	8,12,15,19,20,21,23,25,26,27,40,41,45,47,48,51,52,56,62,67,68,72,76
Q9ULZ3	Q9ULZ3	2kn6-A(1-195)	6n1h-O(112-194)	6n1h-P	100	8,12,15,19,20,21,23,25,26,27,40,41,45,47,48,51,52,56,62,67,68,72,76
Q9ULZ3	Q9ULZ3	2kn6-A(1-195)	7keu-A(113-194)	7keu-B	98	8,12,15,19,20,21,23,25,26,27,40,41,45,47,48,51,52,56,62,67,68,72,76
Q9ULZ3	Q9ULZ3	2kn6-A(1-195)	7keu-A(113-194)	7keu-D	98	8,12,15,19,20,21,23,25,26,27,40,41,45,47,48,51,52,56,62,67,68,72,76
Q9ULZ3	Q9ULZ3	2kn6-A(1-195)	7keu-A(113-194)	7keu-H	98	8,12,15,19,20,21,23,25,26,27,40,41,45,47,48,51,52,56,62,67,68,72,76
Q9ULZ3	Q9ULZ3	2kn6-A(1-195)	7keu-B(113-194)	7keu-C	98	8,12,15,19,20,21,23,25,26,27,40,41,45,47,48,51,52,56,62,67,68,72,76
Q9ULZ3	Q9ULZ3	2kn6-A(1-195)	7keu-B(113-194)	7keu-G	98	8,12,15,19,20,21,23,25,26,27,40,41,45,47,48,51,52,56,62,67,68,72,76
Q9ULZ3	Q9ULZ3	2kn6-A(1-195)	7keu-B(113-194)	7keu-H	98	8,12,15,19,20,21,23,25,26,27,40,41,45,47,48,51,52,56,62,67,68,72,76
Q9ULZ3	Q9ULZ3	2kn6-A(1-195)	7keu-C(113-194)	7keu-D	98	8,12,15,19,20,21,23,25,26,27,40,41,45,47,48,51,52,56,62,67,68,72,76
Q9ULZ3	Q9ULZ3	2kn6-A(1-195)	7keu-C(113-194)	7keu-F	98	8,12,15,19,20,21,23,25,26,27,40,41,45,47,48,51,52,56,62,67,68,72,76
Q9ULZ3	Q9ULZ3	2kn6-A(1-195)	7keu-C(113-194)	7keu-G	98	8,12,15,19,20,21,23,25,26,27,40,41,45,47,48,51,52,56,62,67,68,72,76
Q9ULZ3	Q9ULZ3	2kn6-A(1-195)	7keu-D(113-194)	7keu-E	98	8,12,15,19,20,21,23,25,26,27,40,41,45,47,48,51,52,56,62,67,68,72,76
Q9ULZ3	Q9ULZ3	2kn6-A(1-195)	7keu-D(113-194)	7keu-F	98	8,12,15,19,20,21,23,25,26,27,40,41,45,47,48,51,52,56,62,67,68,72,76
Q9ULZ3	Q9ULZ3	2kn6-A(1-195)	7keu-D(113-194)	7keu-H	98	8,12,15,19,20,21,23,25,26,27,40,41,45,47,48,51,52,56,62,67,68,72,76
Q9UN37	Q96FZ7	1yxr-A(1-77)	2k3w-A(1-84)	2k3w-B	100	13,64
